# Supplementary material for: Polyethylenimine–Bisphosphonate–Cyclodextrin Ternary Conjugates: Supramolecular Systems for the Delivery of Antineoplastic Drugs
Source: PubMed Central journal article supplement (PMC8477368; doi:10.1021/acs.jmedchem.1c00887), 2021-08-09
Supplement: jm1c00887_si_001.pdf [file jm1c00887_si_001.pdf]

# SUPPORTING INFORMATION

## Polyethylenimine-Bisphosphonate-Cyclodextrin Ternary Conjugates: Supramolecular Systems for the Delivery of Antineoplastic Drugs

**Simona Plesselova,<sup>a,d,†</sup> Pablo Garcia-Cerezo,<sup>b,d,†</sup> Víctor Blanco,<sup>b,d</sup> Francisco J. Reche-Perez,<sup>a,d</sup> Fernando Hernandez-Mateo,<sup>b,c,d</sup> Francisco Santoyo-Gonzalez,<sup>b,c,d\*</sup> María Dolores Giron-Gonzalez,<sup>a,d</sup> and Rafael Salto-Gonzalez<sup>a,d\*</sup>**

<sup>a</sup>Department of Biochemistry and Molecular Biology II, School of Pharmacy, University of Granada, E-18071 Granada, Spain

<sup>b</sup>Department of Organic Chemistry, School of Sciences, University of Granada, E-18071 Granada, Spain

<sup>c</sup>Biotechnology Institute, University of Granada, E-18071 Granada, Spain

<sup>d</sup>Unit of Excellence in Chemistry Applied to Biomedicine and the Environment of the University of Granada, E-18071 Granada, Spain

Corresponding Authors e-mails: [rsalto@ugr.es](mailto:rsalto@ugr.es); [fsantoyo@ugr.es](mailto:fsantoyo@ugr.es)

## List of Contents

|                                                                                                        |            |
|--------------------------------------------------------------------------------------------------------|------------|
| <b>1. Synthesis and characterization of PEI-BP-CD (20-21a,b) and PEI-MP-CD (22a,b) ternary systems</b> | <b>S3</b>  |
| <b>2. NMR Spectra</b>                                                                                  | <b>S4</b>  |
| <b>3. HRMS Spectra of key Products</b>                                                                 | <b>S35</b> |
| <b>5. Particle size of the PEI-BP-CD ternary conjugates</b>                                            | <b>S42</b> |
| <b>6. Subcellular fractionation of MG-63 cells</b>                                                     | <b>S43</b> |
| <b>7. Effects of inhibitors of internalization routes on DOX<sub>21b</sub> uptake</b>                  | <b>S44</b> |
| <b>8. Specific PEI-BP-CD (20-21b) and PEI-MP-CD (22b) conjugates uptake in bone cells</b>              | <b>S45</b> |
| <b>9. <i>In vivo</i> imaging of tumor MDA-MB-231 xenografts in mice</b>                                | <b>S46</b> |

## 1. Synthesis of PEI-BP-CD (20-21a,b) and PEI-MP-CD (22a,b) ternary systems

Table S1. Individual Conditions.

| Entry | 2kPEI ( $\mu\text{mol}$ ) | Phosphonate ( $\mu\text{mol}$ ) | $\beta$ -CD-VS ( $\mu\text{mol}$ ) | Compound(mg) |
|-------|---------------------------|---------------------------------|------------------------------------|--------------|
| 1     | 12.5                      | 7 (12.5)                        | 50.0                               | 20a (95)     |
| 2     | 12.5                      | 7 (25.0)                        | 50.0                               | 20b (47)     |
| 3     | 12.5                      | 11 (12.5)                       | 50.0                               | 21a (76)     |
| 4     | 12.5                      | 11 (25.0)                       | 50.0                               | 21b (82)     |
| 5     | 7.5                       | 17 (7.5)                        | 30.0                               | 22a (54)     |
| 6     | 7.5                       | 17 (15.0)                       | 30.0                               | 22b (57)     |

**Compound 20a.** White foam.  $^{31}\text{P}$  NMR (202 MHz,  $\text{D}_2\text{O}/\text{DMSO-d}_6$ ):  $\delta=17.73$ . IR (neat):  $\nu=2969, 1740, 1367, 1216, 1026\text{ cm}^{-1}$ .

**Compound 20b.** White foam.  $^{31}\text{P}$  NMR (162 MHz,  $\text{D}_2\text{O}/\text{DMSO-d}_6$ ):  $\delta=17.75$ . IR (neat):  $\nu=2932, 1740, 1367, 1216, 1026\text{ cm}^{-1}$ .

**Compound 21a.** White solid.  $^{31}\text{P}$  NMR (202 MHz,  $\text{D}_2\text{O}/\text{DMSO-d}_6$ ):  $\delta=6.50$ . IR (neat):  $\nu=3282, 2930, 1285, 1079, 1022\text{ cm}^{-1}$ .

**Compound 21b.** White solid.  $^{31}\text{P}$  NMR (202 MHz,  $\text{D}_2\text{O}/\text{DMSO-d}_6$ ):  $\delta=6.89$ . IR (neat):  $\nu=3282, 2930, 1739, 1367, 1079, 1026\text{ cm}^{-1}$ .

**Compound 22a.** Light yellow solid.  $^{31}\text{P}$  NMR (202 MHz,  $\text{D}_2\text{O}/\text{DMSO-d}_6$ ):  $\delta=11.50$ . IR (neat):  $\nu=3271, 2923, 1738, 1365, 1078, 1024\text{ cm}^{-1}$ .

**Compound 22b.** Light yellow solid.  $^{31}\text{P}$  NMR (202 MHz,  $\text{D}_2\text{O}/\text{DMSO-d}_6$ ):  $\delta=11.01$ . IR (neat):  $\nu=2914, 1740, 1367, 1080, 1029\text{ cm}^{-1}$ .

### 3. NMR spectra

#### Compound 2:

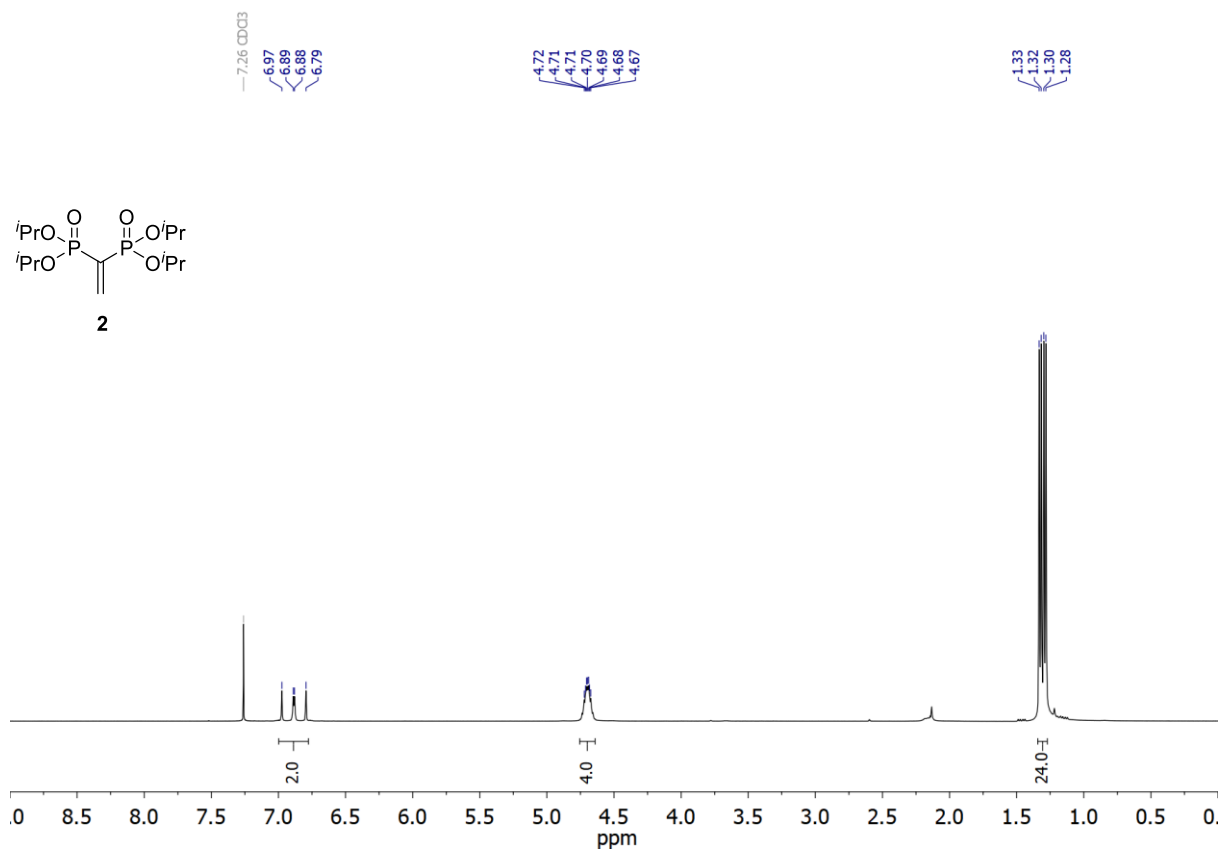

Figure S1. <sup>1</sup>H NMR (400 MHz, CDCl<sub>3</sub>) spectrum of 2.

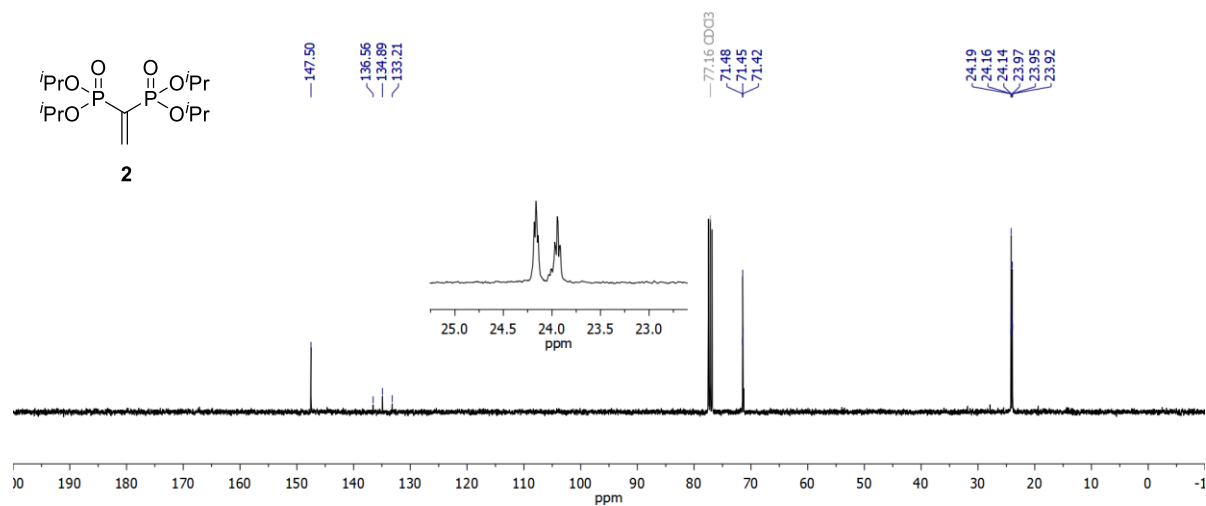

Figure S2. <sup>13</sup>C NMR (101 MHz, CDCl<sub>3</sub>) spectrum of 2.

### Compound 4:

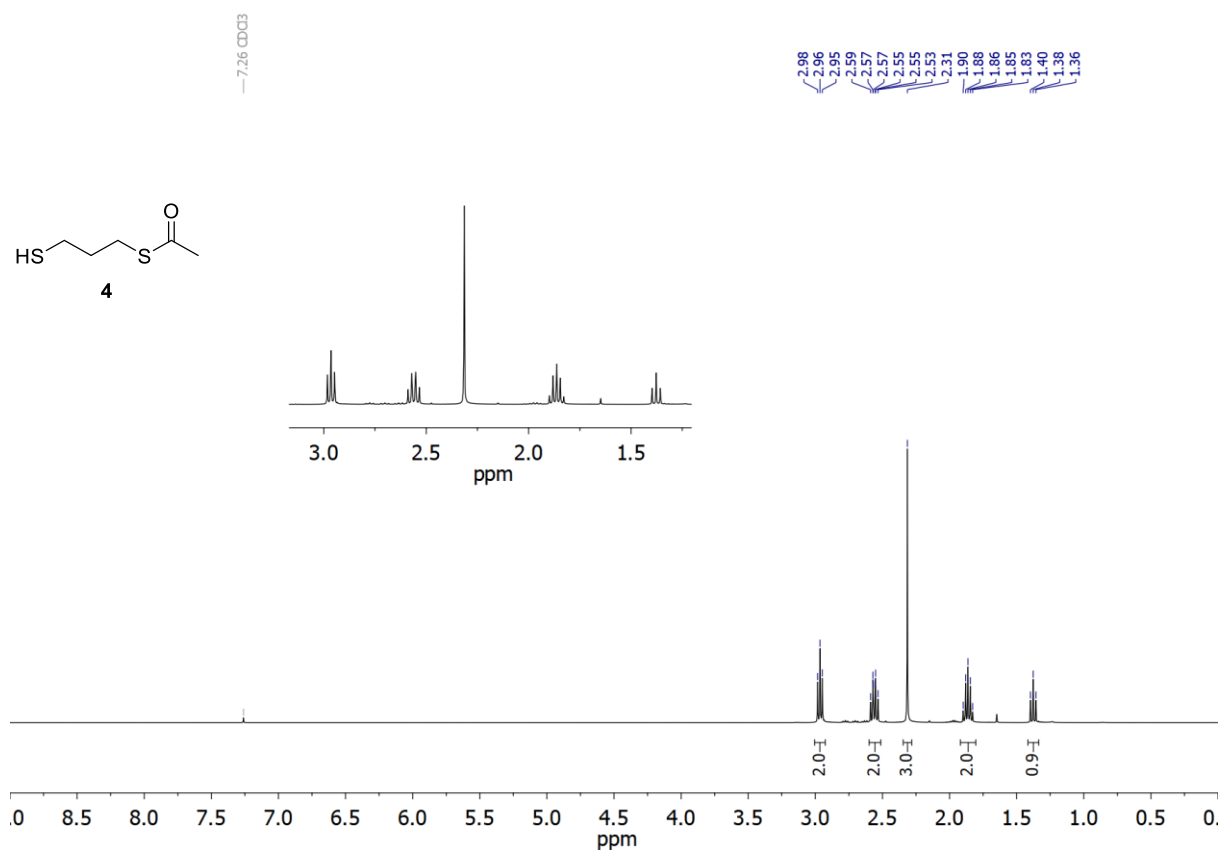

Figure S3. <sup>1</sup>H NMR (400 MHz, CDCl<sub>3</sub>) spectrum of 4.

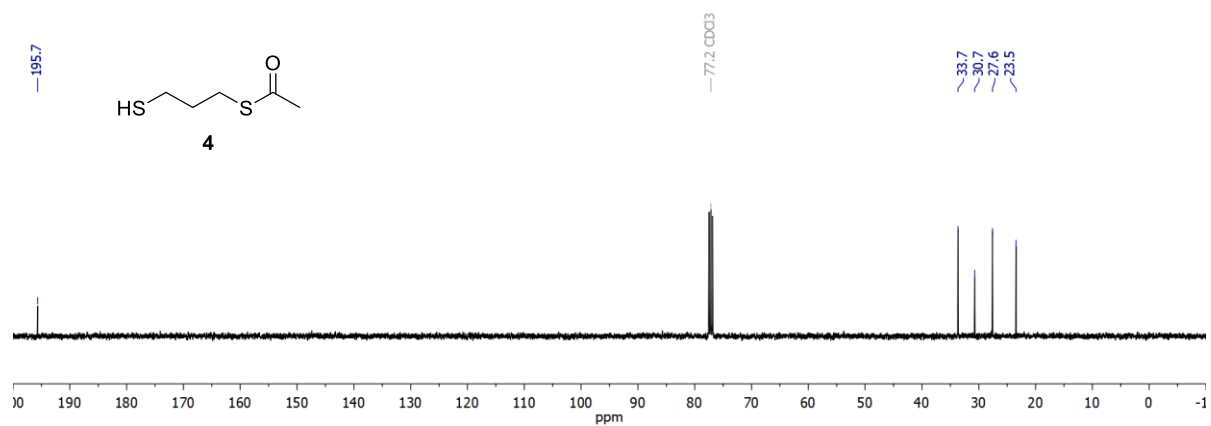

Figure S4. <sup>13</sup>C NMR (101 MHz, CDCl<sub>3</sub>) spectrum of 4.



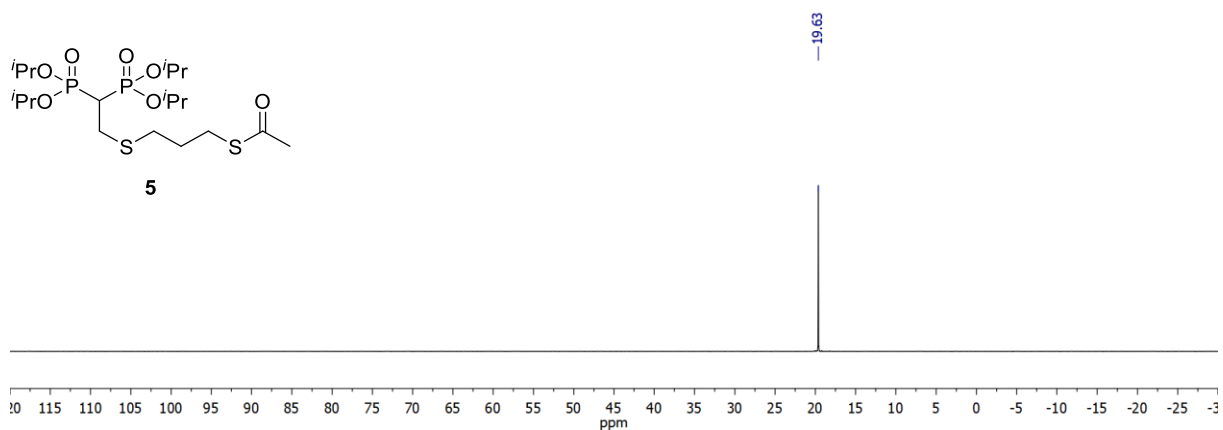

**Compound 6:**

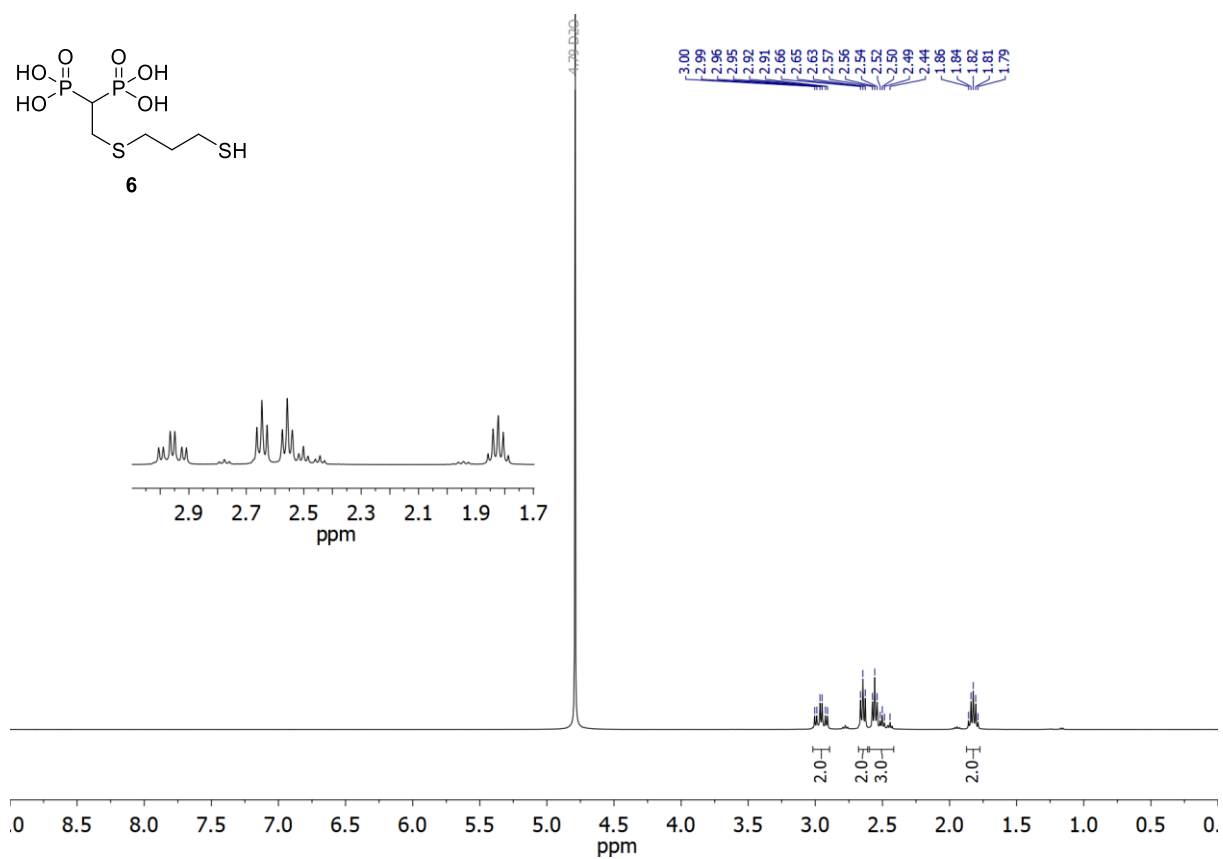

**Compound 7:**

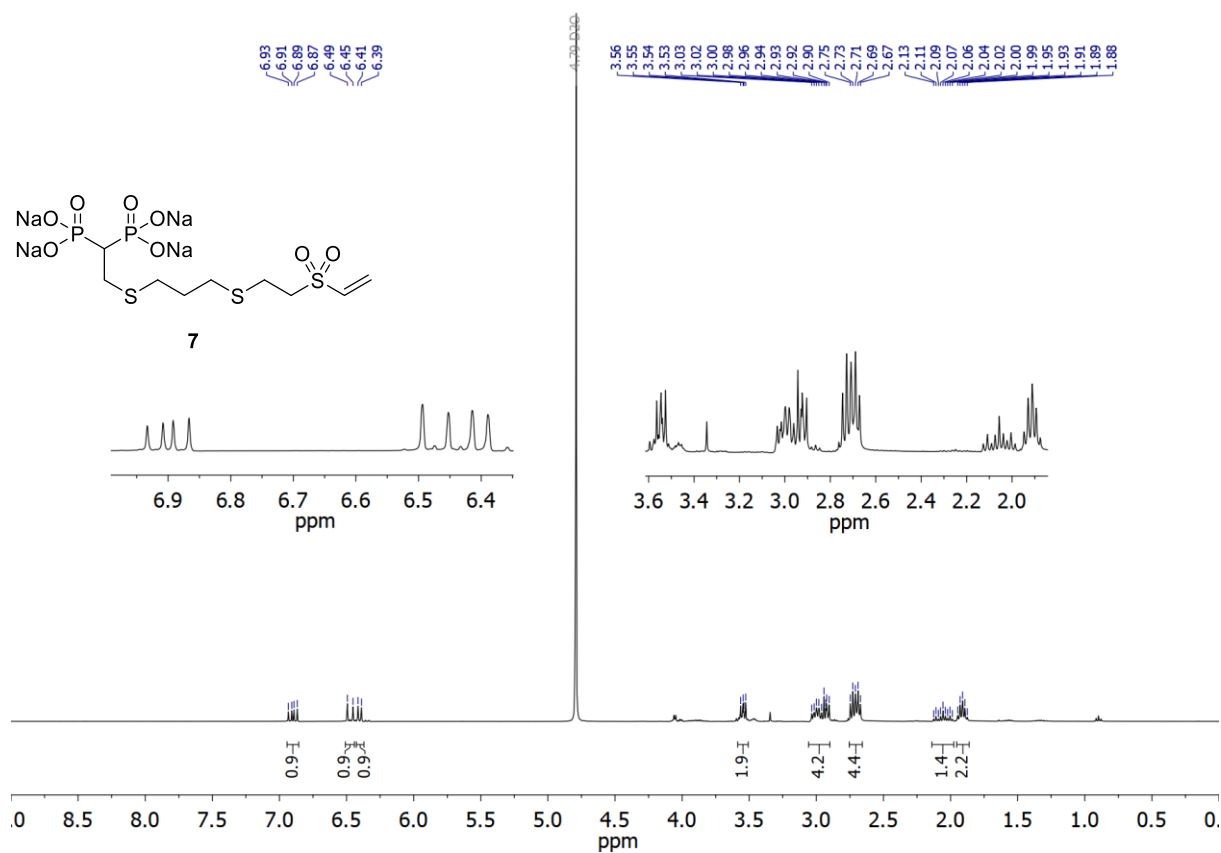

**Figure S9.** <sup>1</sup>H NMR (400 MHz, D<sub>2</sub>O) spectrum of **7**.

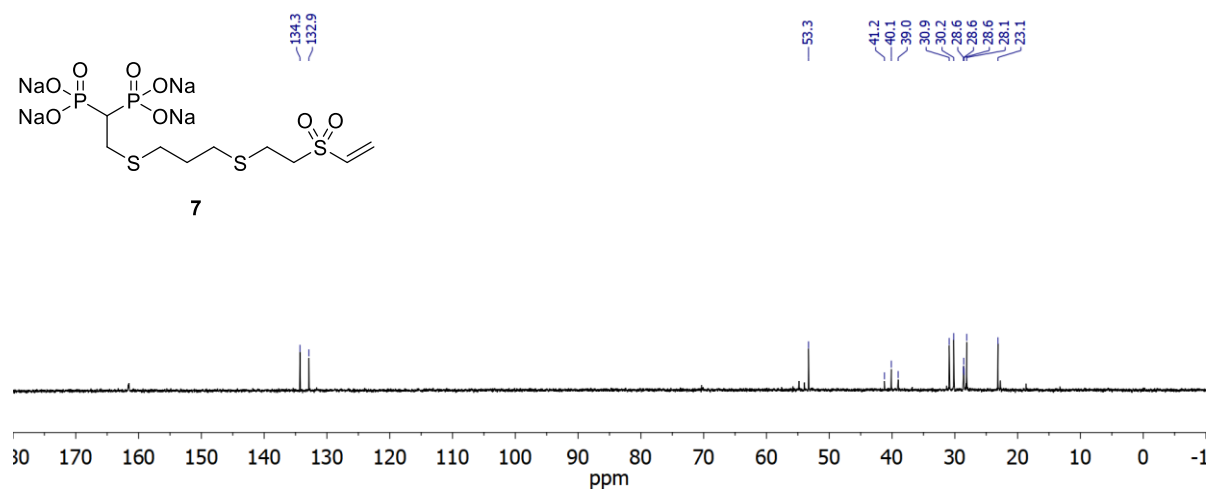

**Figure S10.** <sup>13</sup>C NMR (101 MHz, D<sub>2</sub>O) spectrum of **7**.



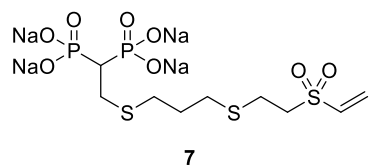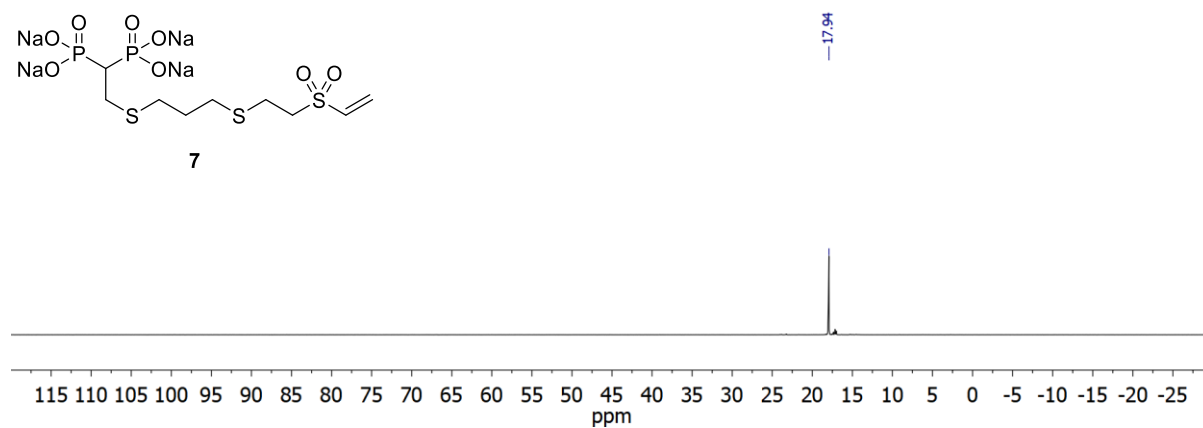

Figure S11.  $^{31}\text{P}$  NMR (162 MHz,  $\text{D}_2\text{O}$ ) spectrum of 7.

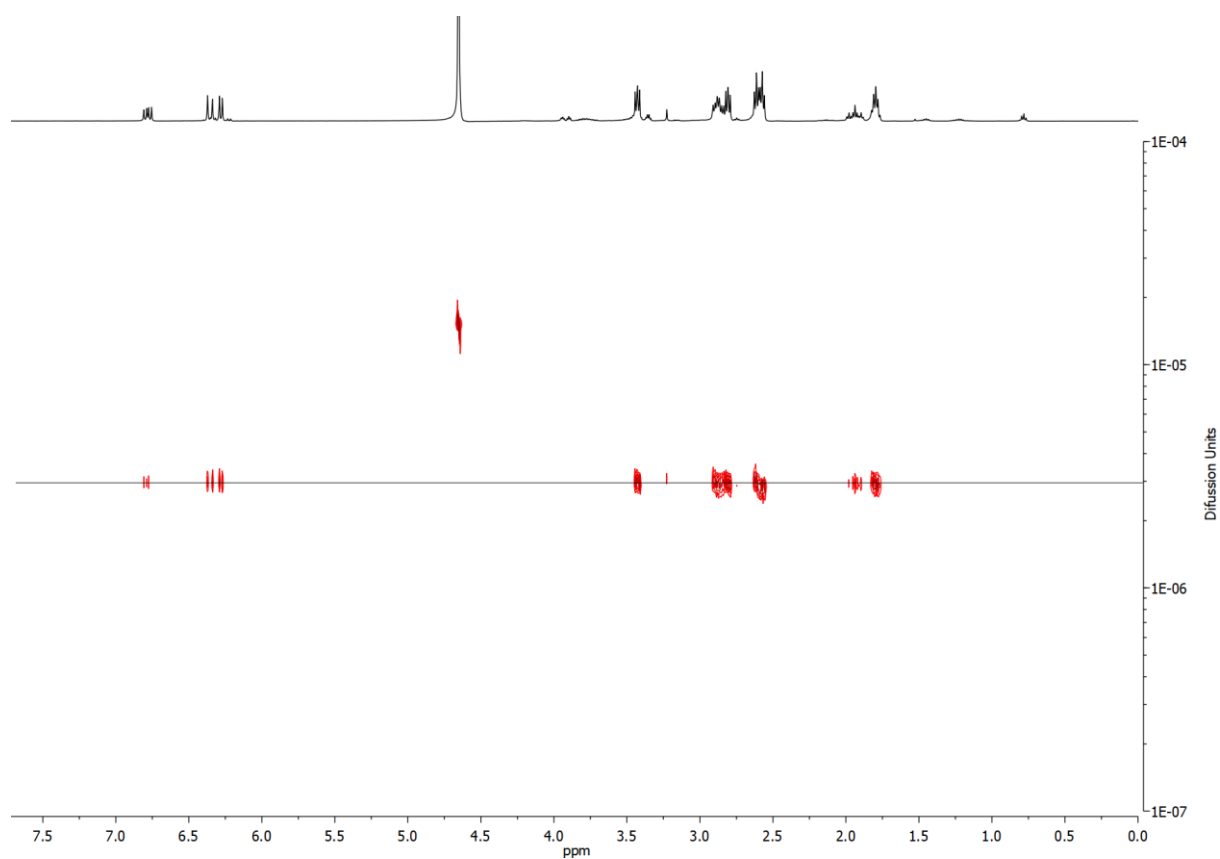

Figure S12. DOSY NMR (500 MHz,  $\text{D}_2\text{O}$ ) spectrum of 7.

### Compound 9:

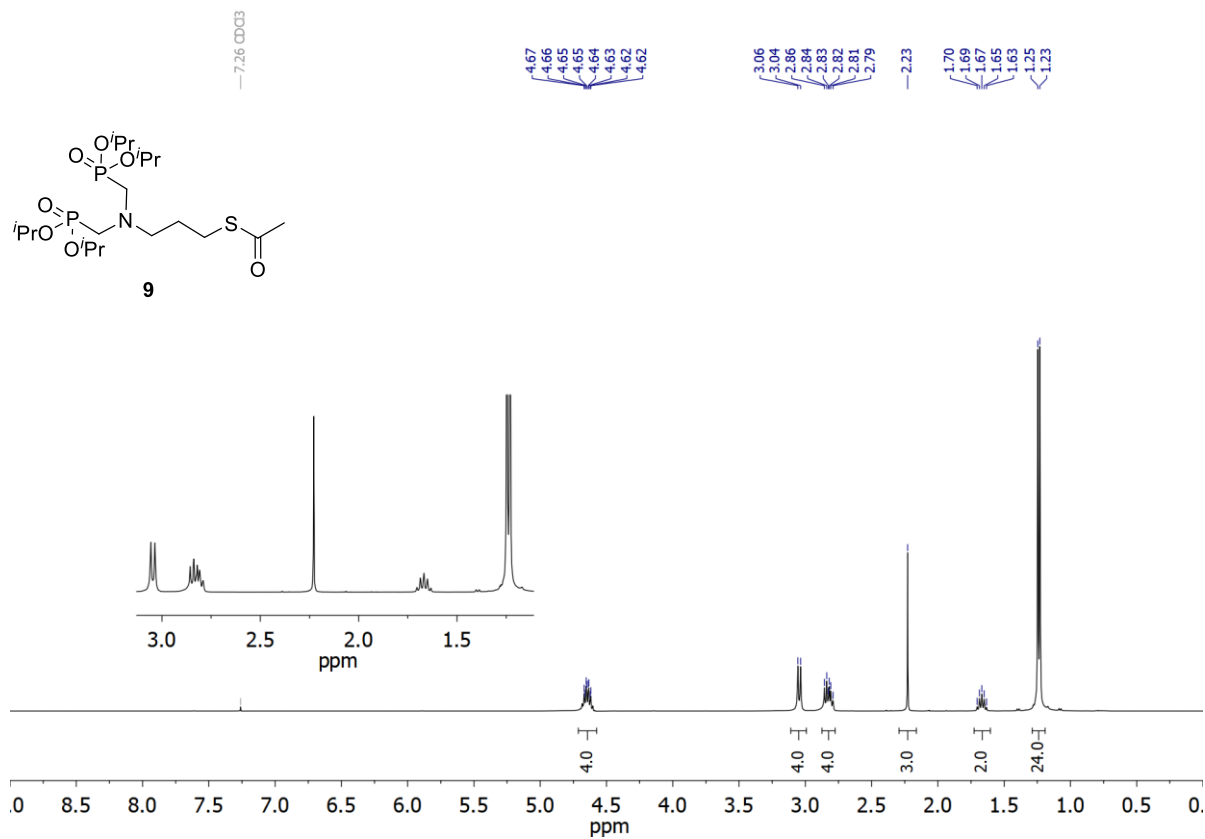

Figure S13. <sup>1</sup>H NMR (400 MHz, CDCl<sub>3</sub>) spectrum of 9.

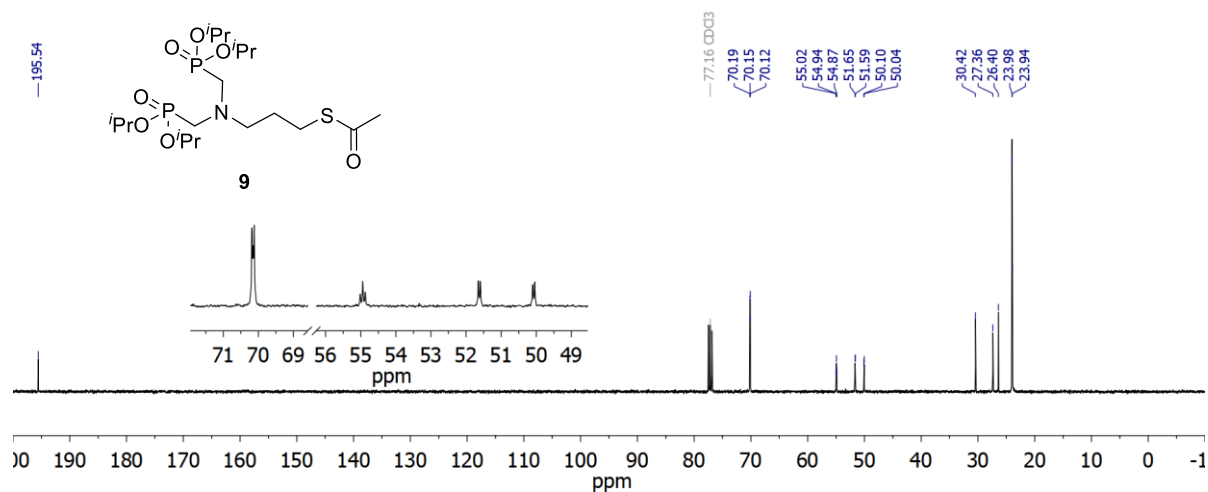

Figure S14. <sup>13</sup>C NMR (101 MHz, CDCl<sub>3</sub>) spectrum of 9.



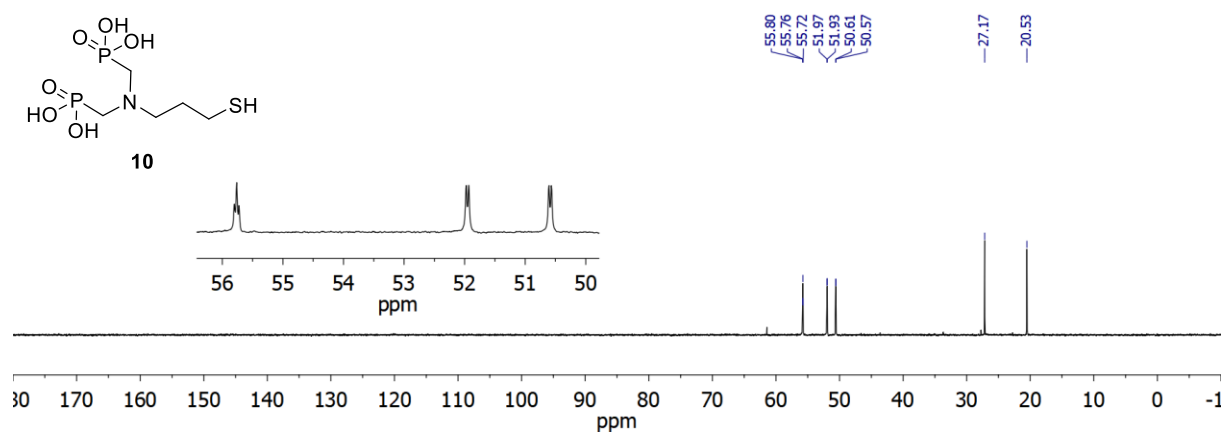

**Figure S17.**  $^{13}\text{C}$  NMR (101 MHz,  $\text{D}_2\text{O}$ ) spectrum of **10**.

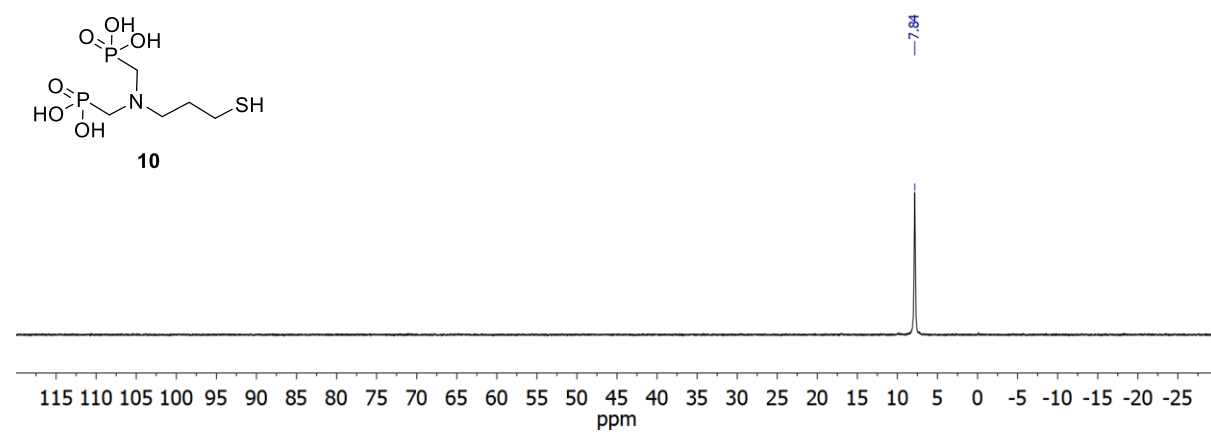

**Figure S18.**  $^{31}\text{P}$  NMR (162 MHz,  $\text{D}_2\text{O}$ ) spectrum of **10**.

**Compound 11:**

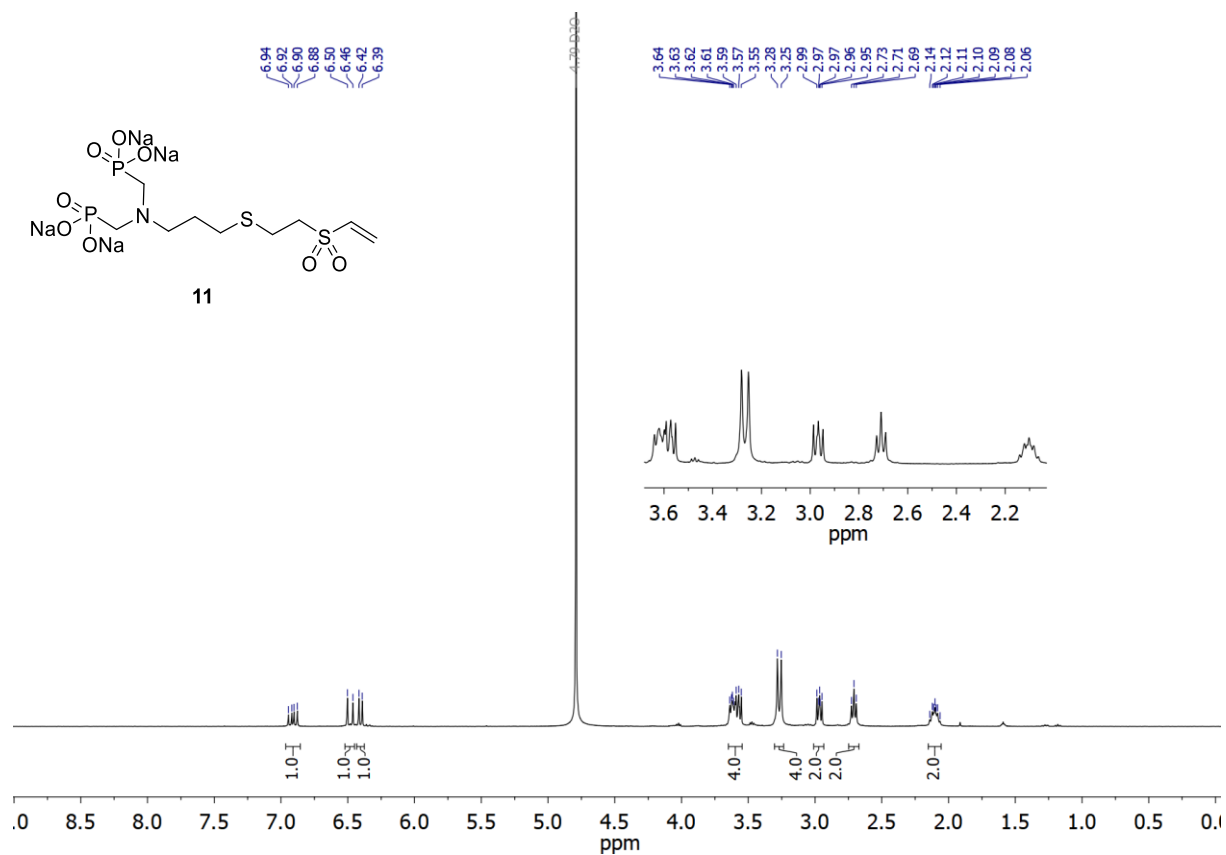

**Figure S19.** <sup>1</sup>H NMR (400 MHz, D<sub>2</sub>O) spectrum of **11**.

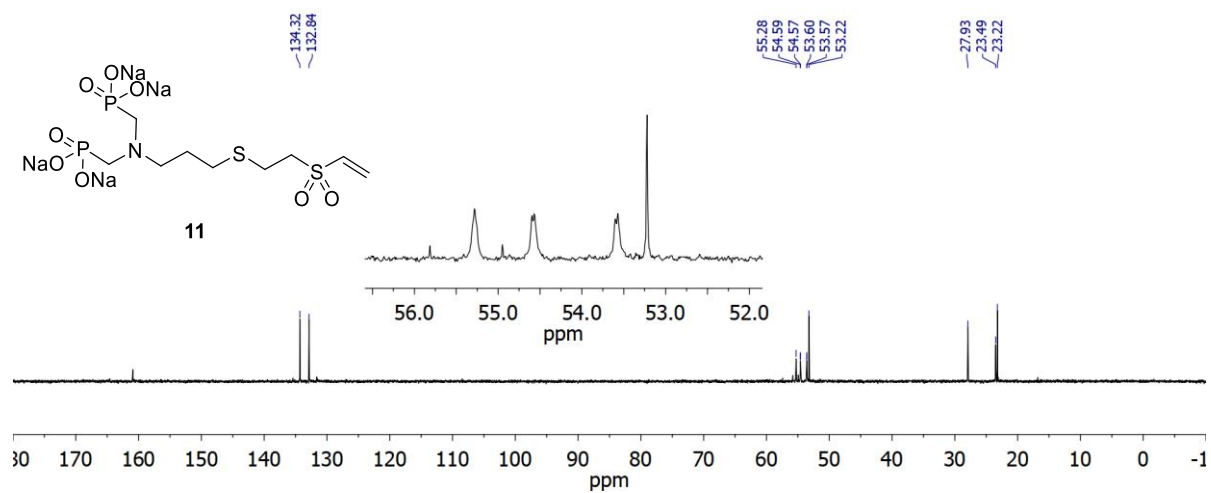

**Figure S20.** <sup>13</sup>C NMR (126 MHz, D<sub>2</sub>O) spectrum of **11**.

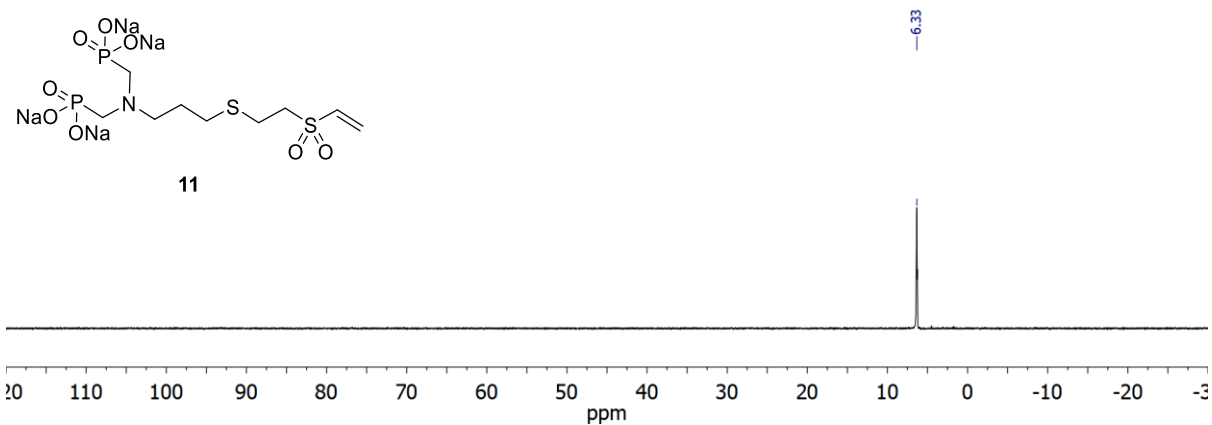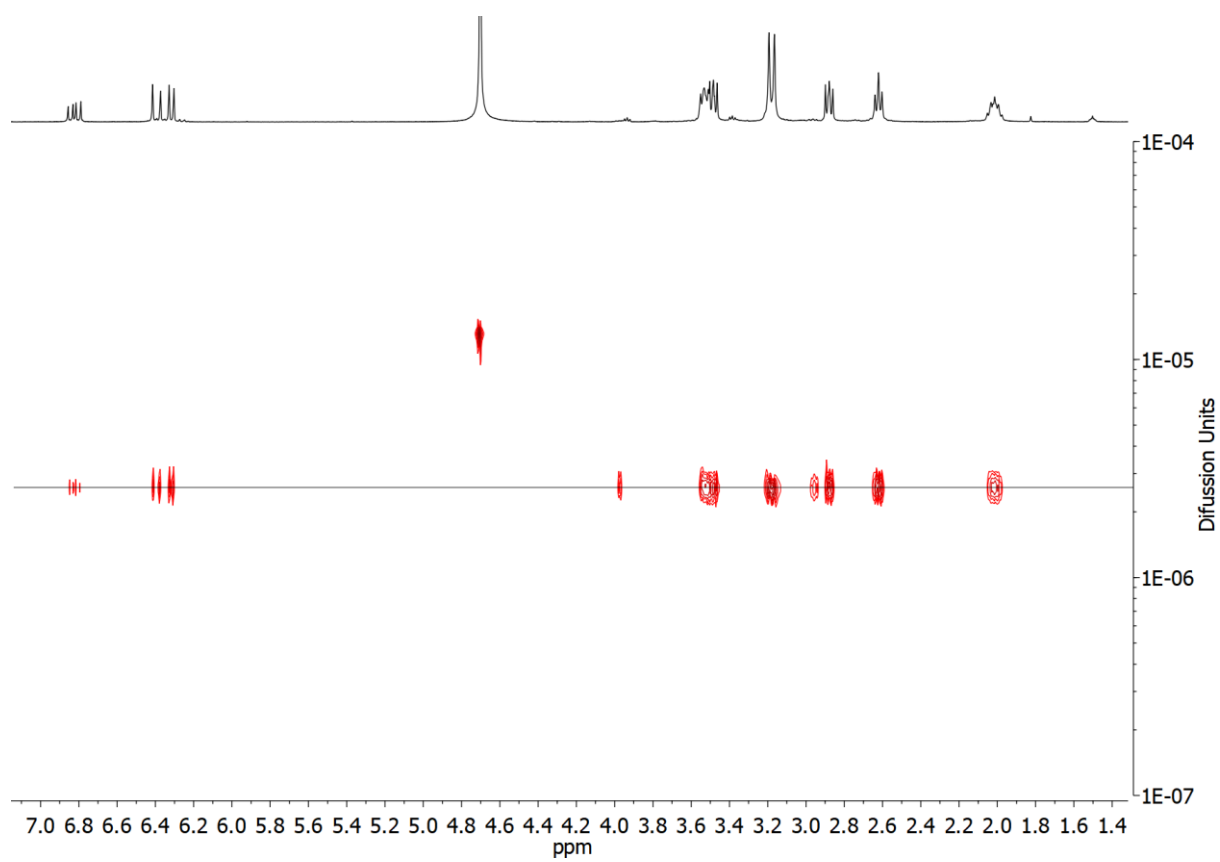

**Figure S22.** DOSY NMR (500 MHz,  $\text{D}_2\text{O}$ ) spectrum of **11**.

**Compound 13:**

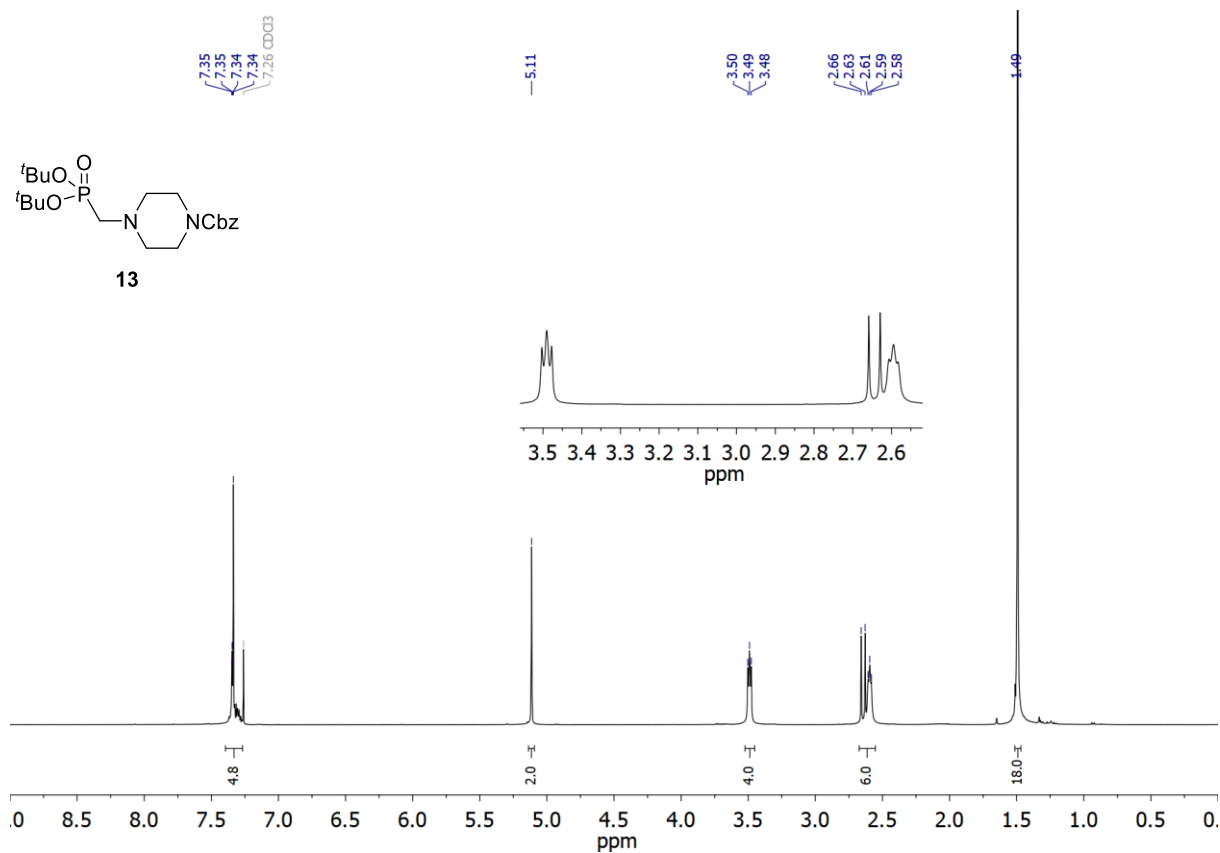

**Figure S23.** <sup>1</sup>H NMR (400 MHz, CDCl<sub>3</sub>) spectrum of **13**.

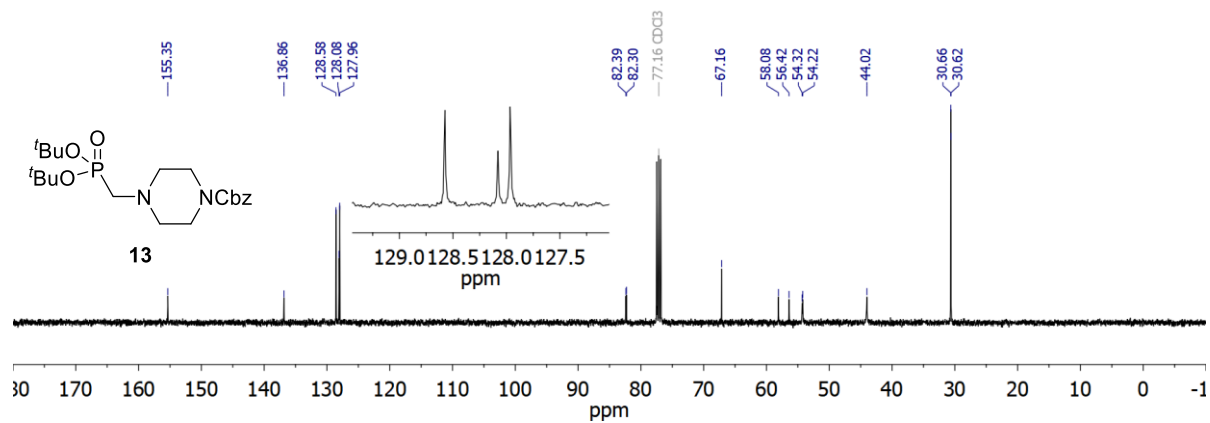

**Figure S24.** <sup>13</sup>C NMR (101 MHz, CDCl<sub>3</sub>) spectrum of **13**.

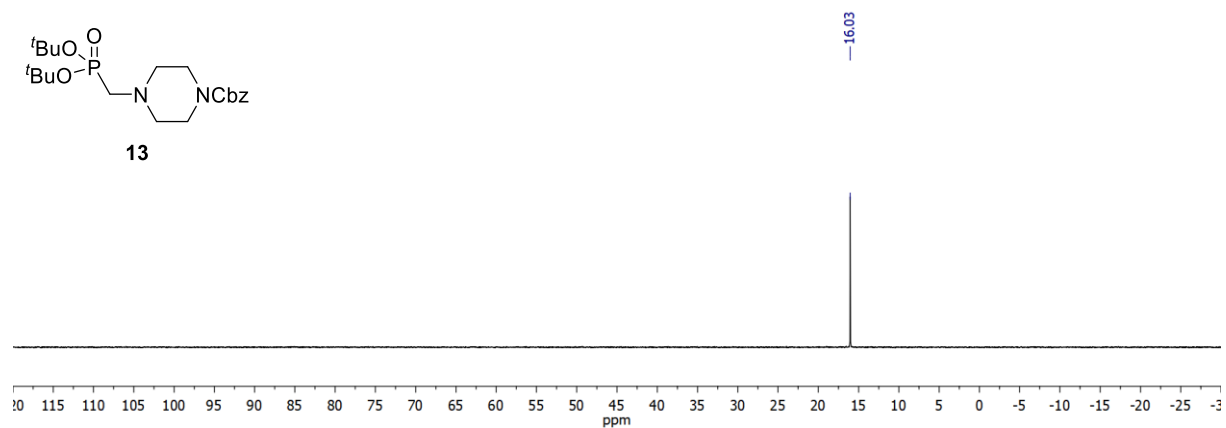

**Compound 14:**

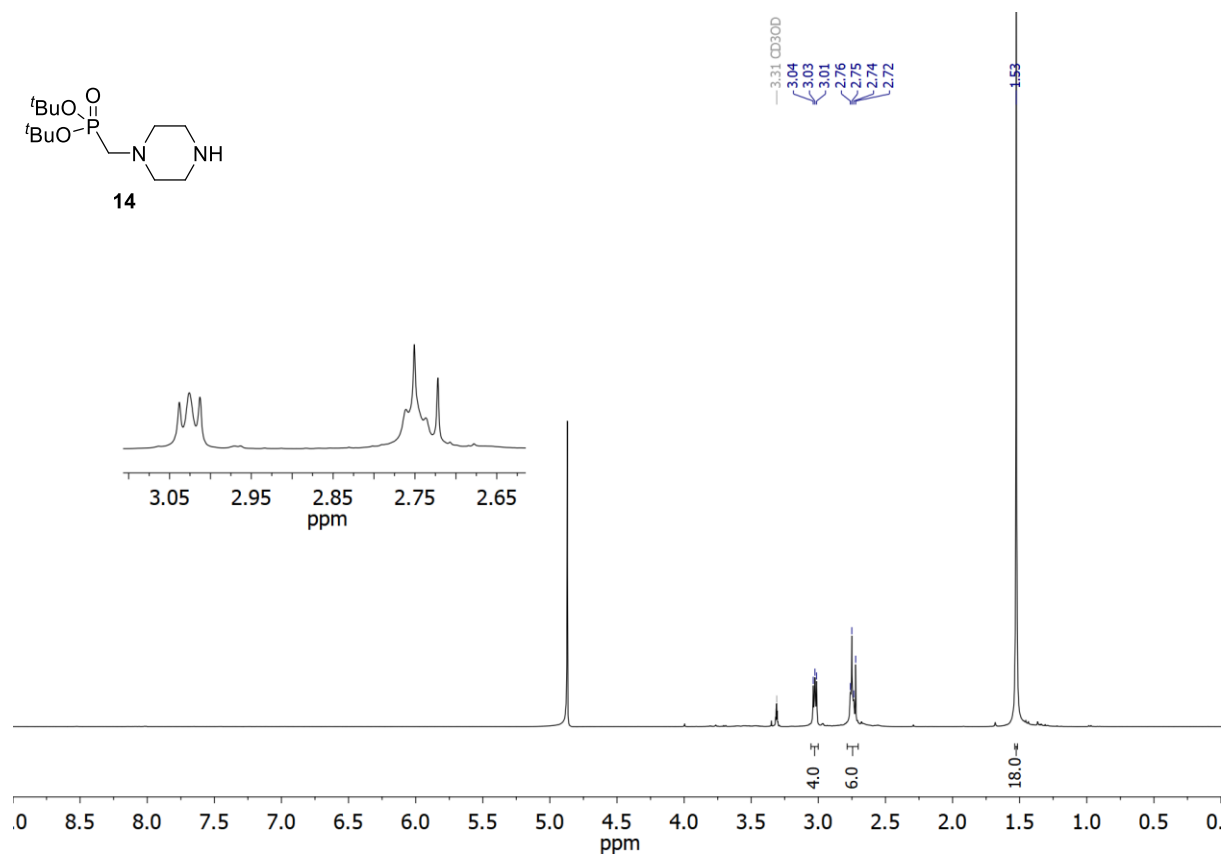



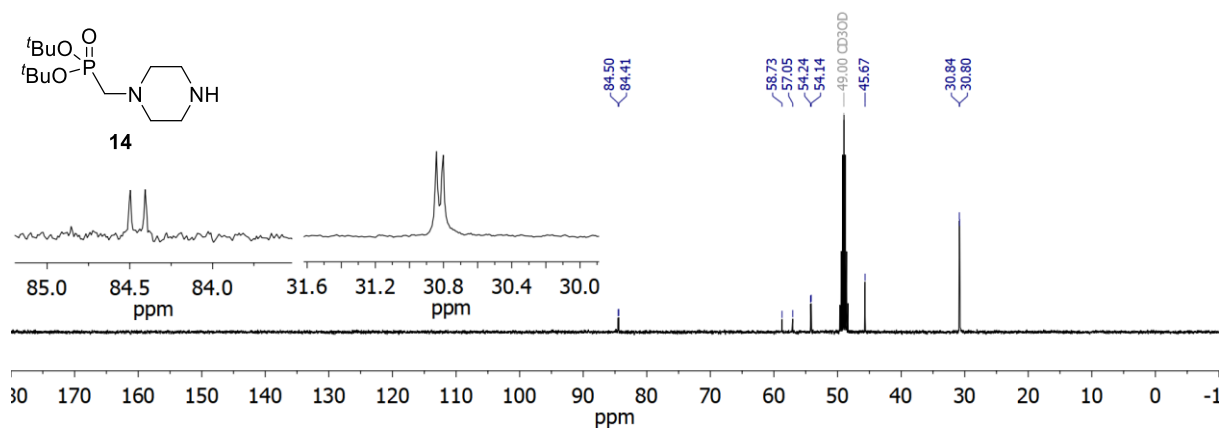

**Figure S27.**  $^{13}\text{C}$  NMR (101 MHz,  $\text{CD}_3\text{OD}$ ) spectrum of **14**.

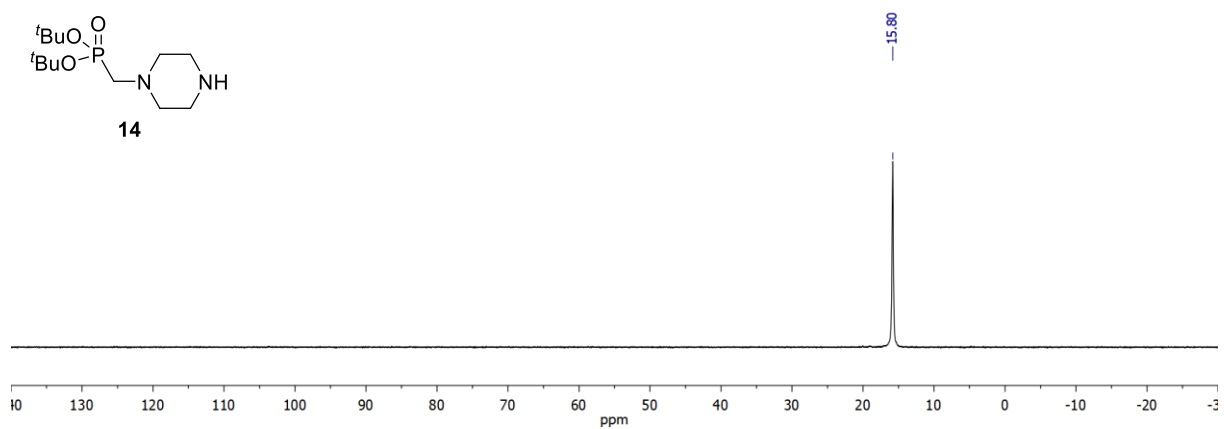

**Figure S28.**  $^{31}\text{P}$  NMR (162 MHz,  $\text{CD}_3\text{OD}$ ) spectrum of **14**.



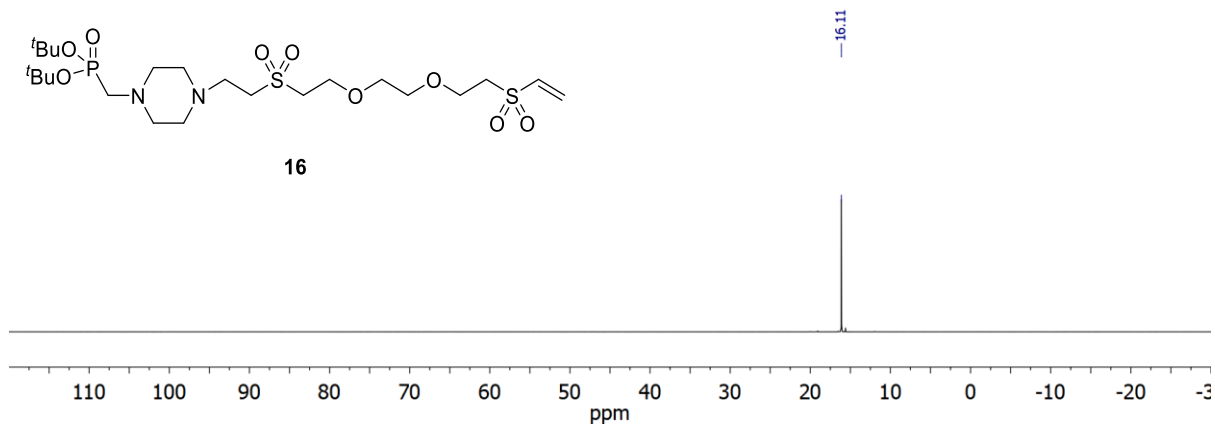

**Figure S31.**  $^{31}\text{P}$  NMR (202 MHz,  $\text{CDCl}_3$ ) spectrum of **16**.

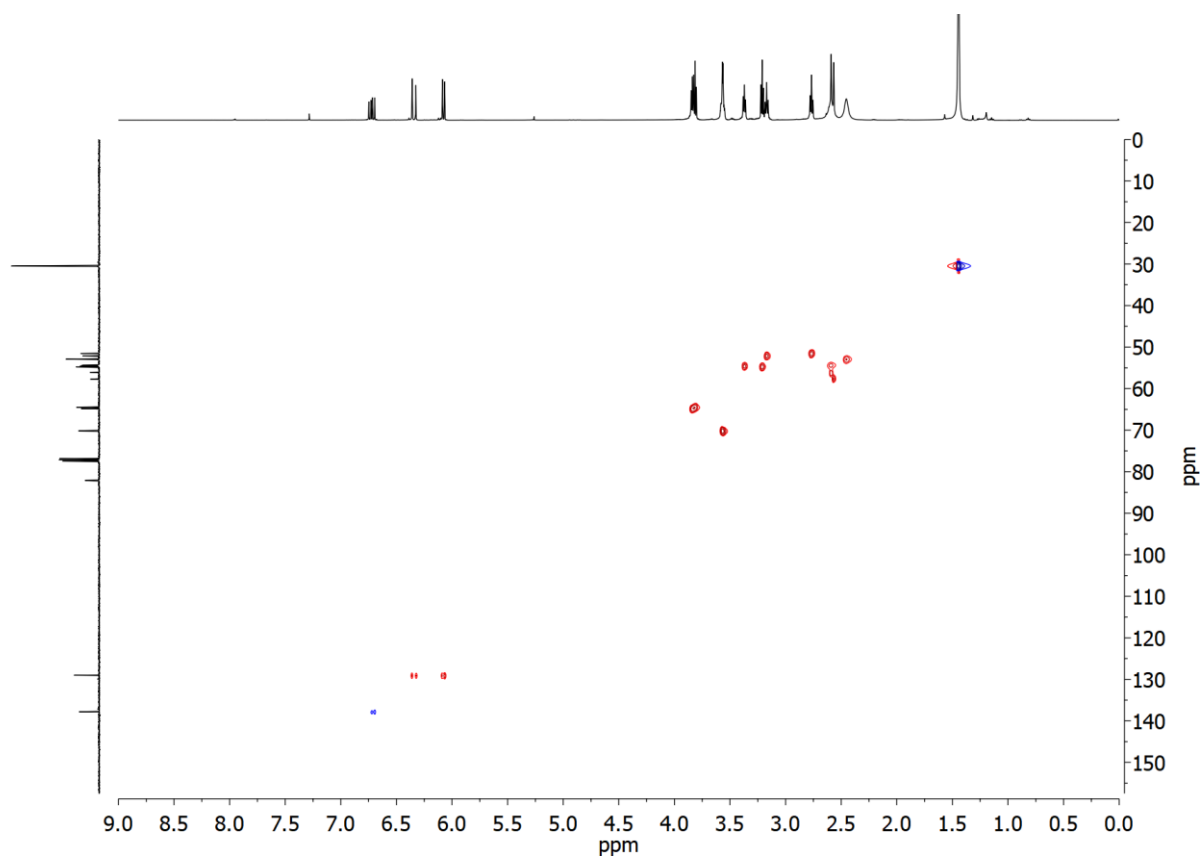

**Figure S32.** HSQC NMR (500 MHz and 126 MHz,  $\text{CDCl}_3$ ) spectrum of **16**.

**Compound 17:**

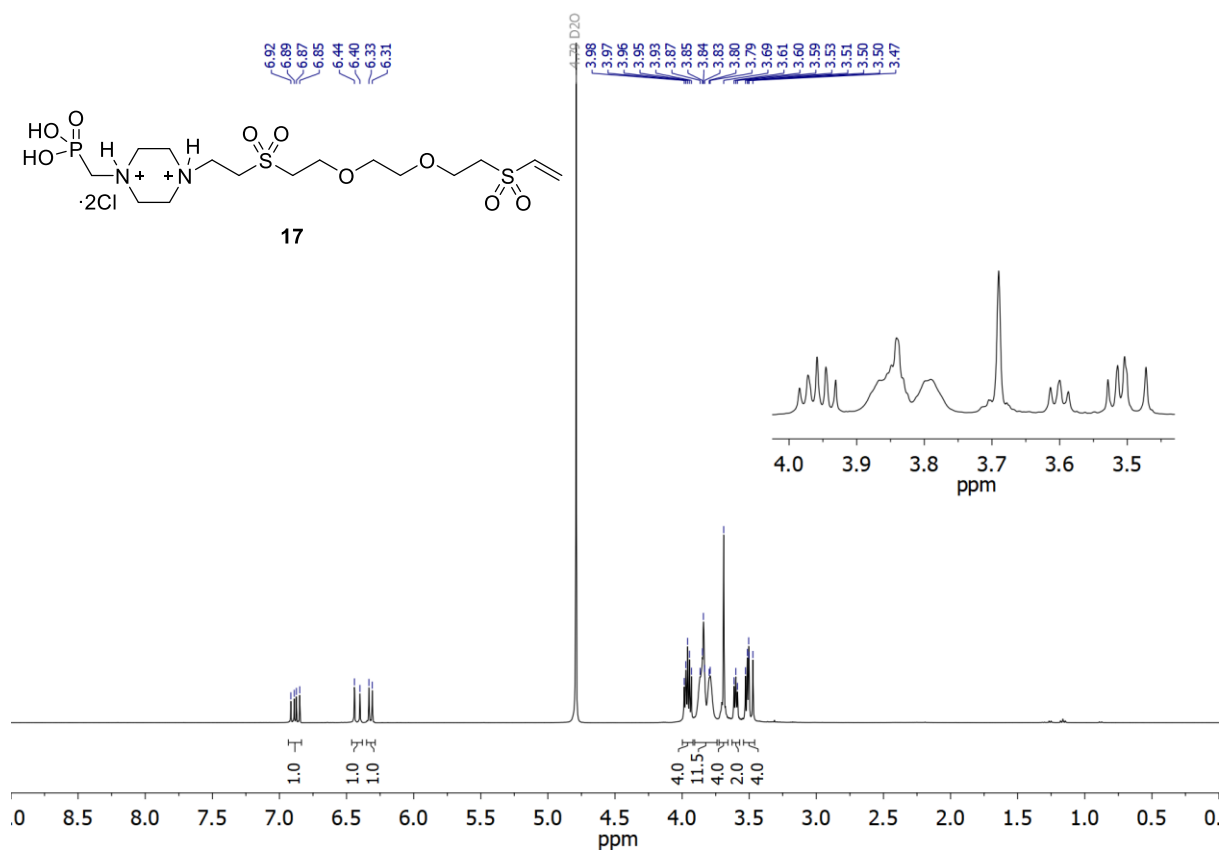

**Figure S33.** <sup>1</sup>H NMR (400 MHz, D<sub>2</sub>O) spectrum of 17.

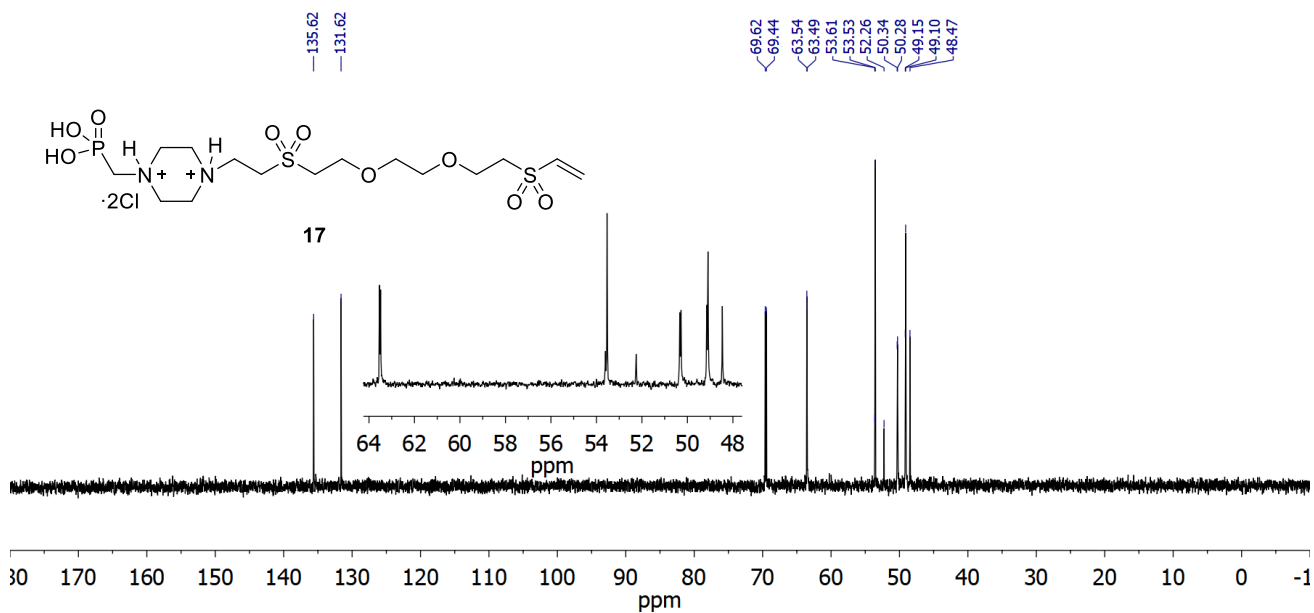

**Figure S34.** <sup>13</sup>C NMR (101 MHz, D<sub>2</sub>O) spectrum of 17.

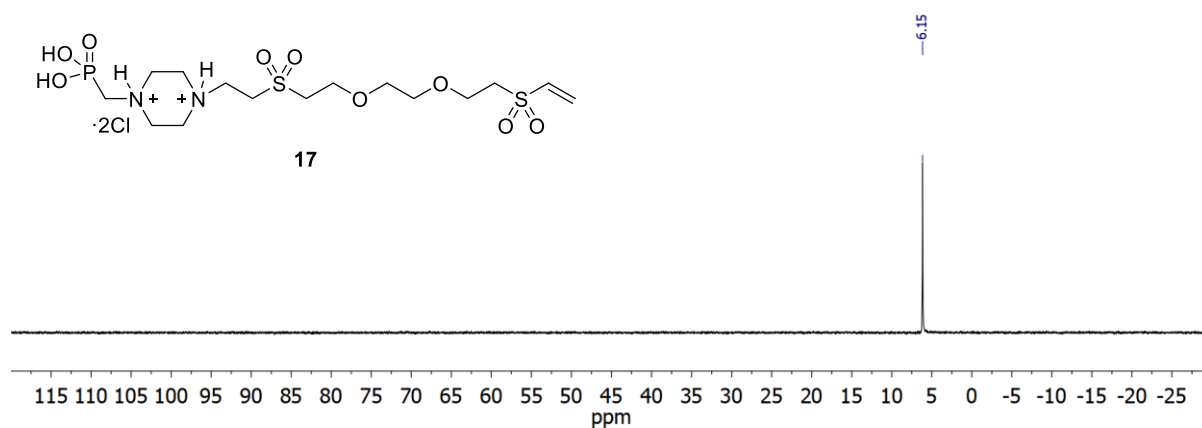

**Figure S35.**  $^{31}\text{P}$  NMR (162 MHz,  $\text{D}_2\text{O}$ ) spectrum of **17**.

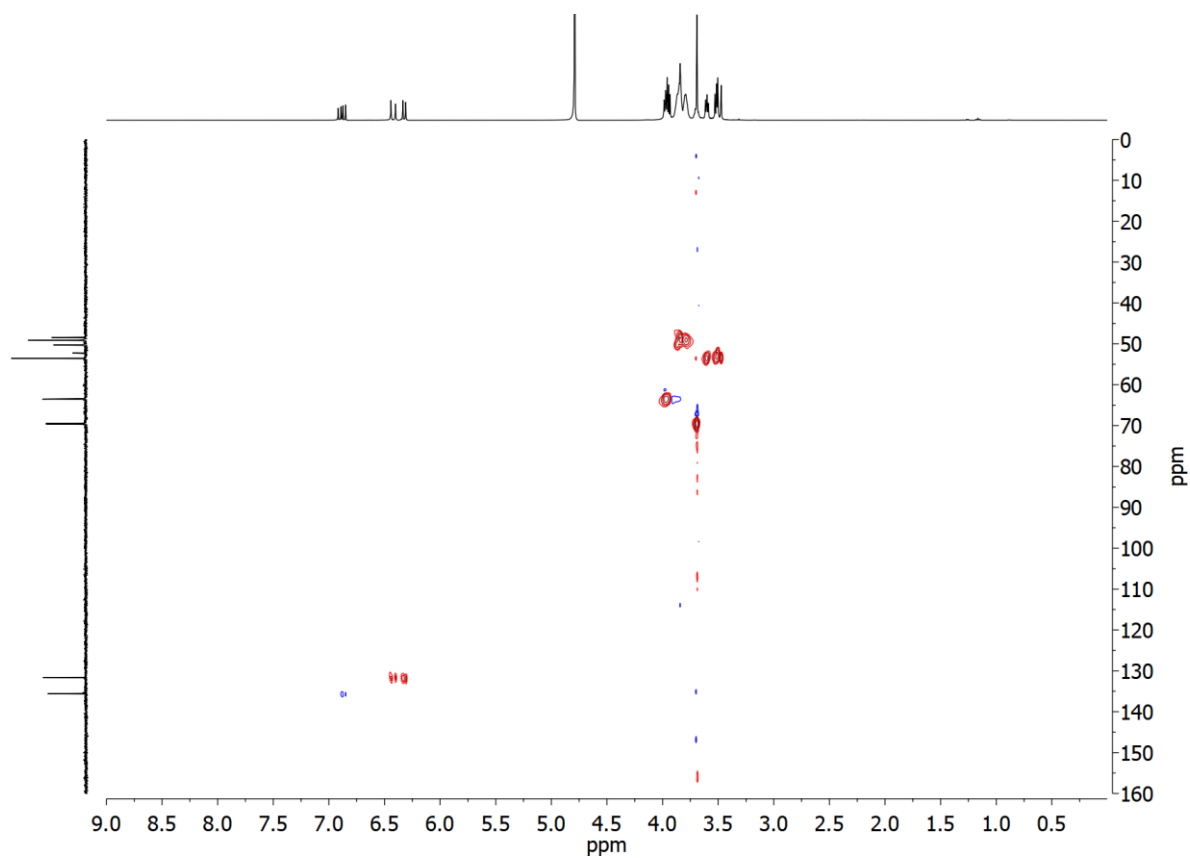

**Figure S36.** HSQC NMR (400 MHz and 101 MHz,  $\text{D}_2\text{O}$ ) spectrum of **17**.

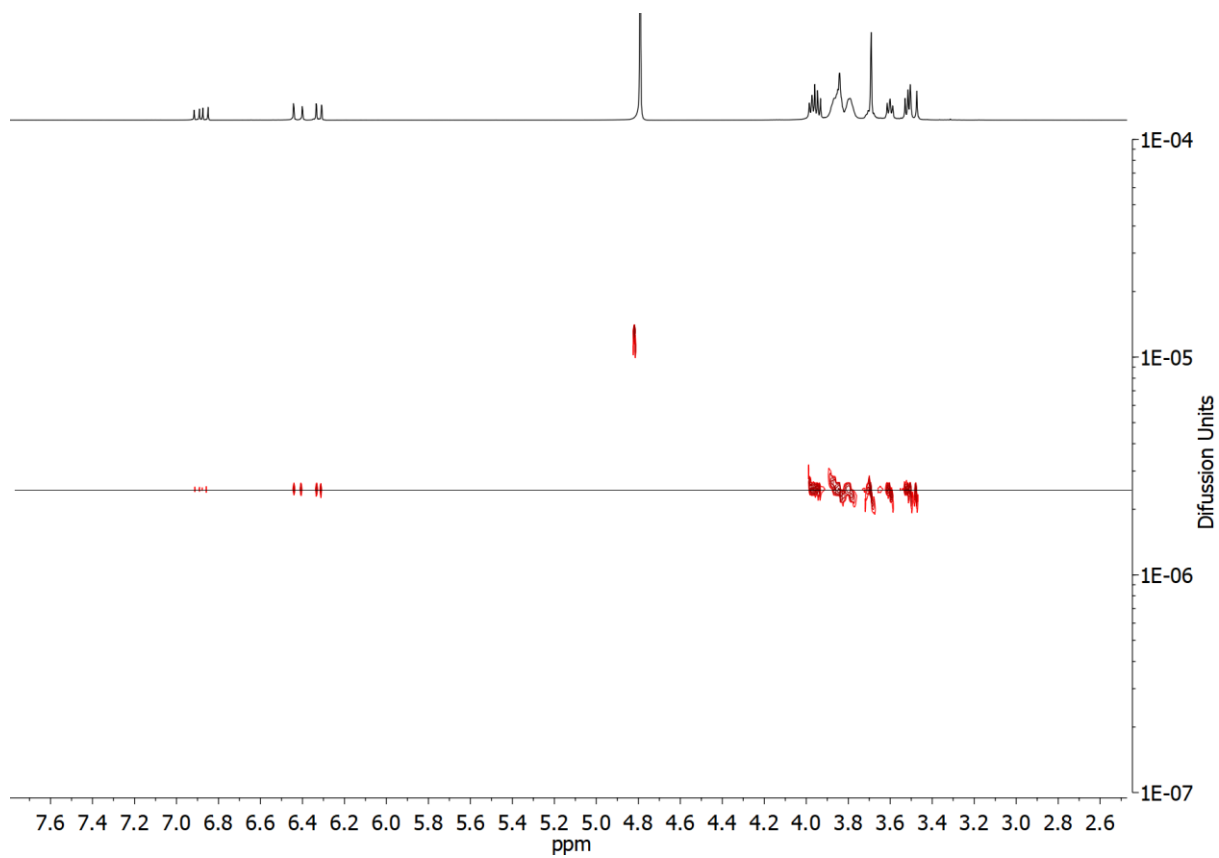

**Figure S37.** DOSY NMR (500 MHz, D<sub>2</sub>O) spectrum of **17**.

**Compound 20a:**

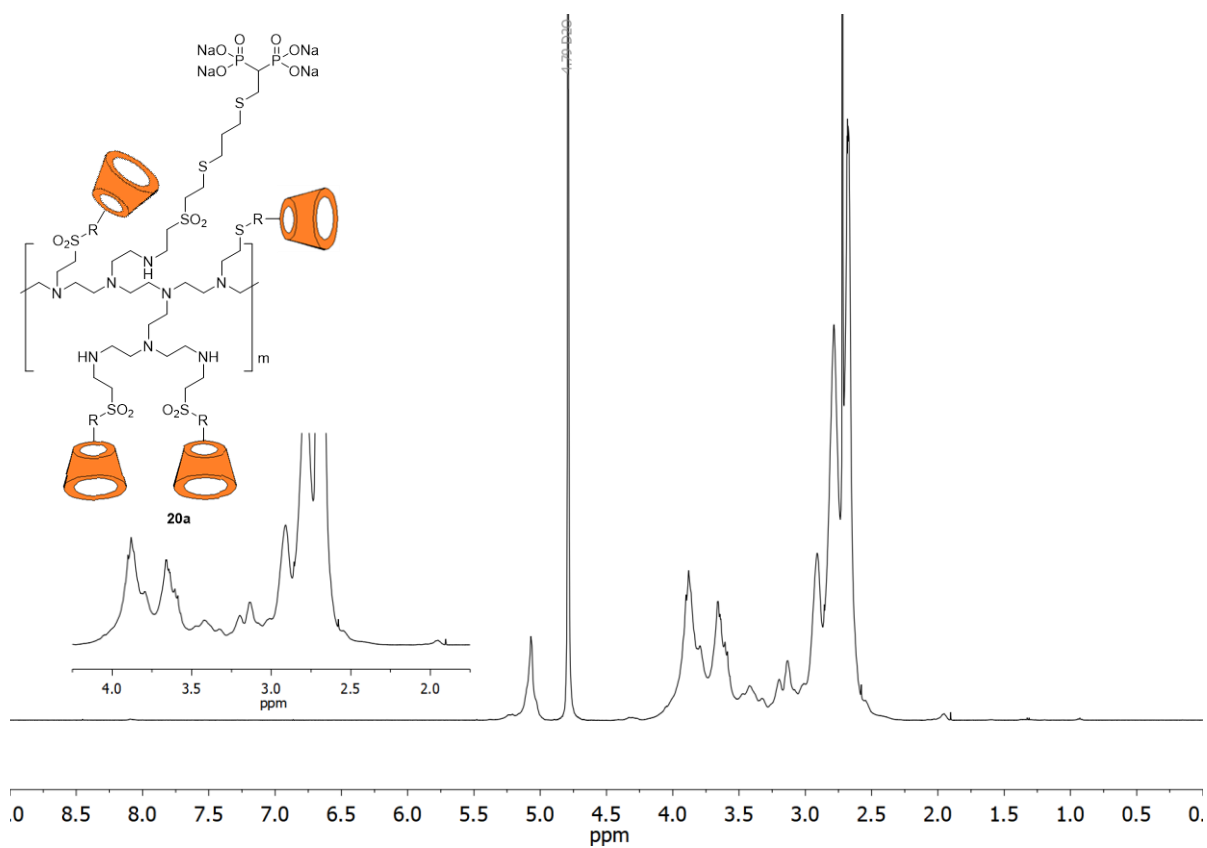

**Figure S38.**  $^1\text{H}$  NMR (500 MHz,  $\text{D}_2\text{O}/\text{DMSO-}d_6$ ) spectrum of 20a.

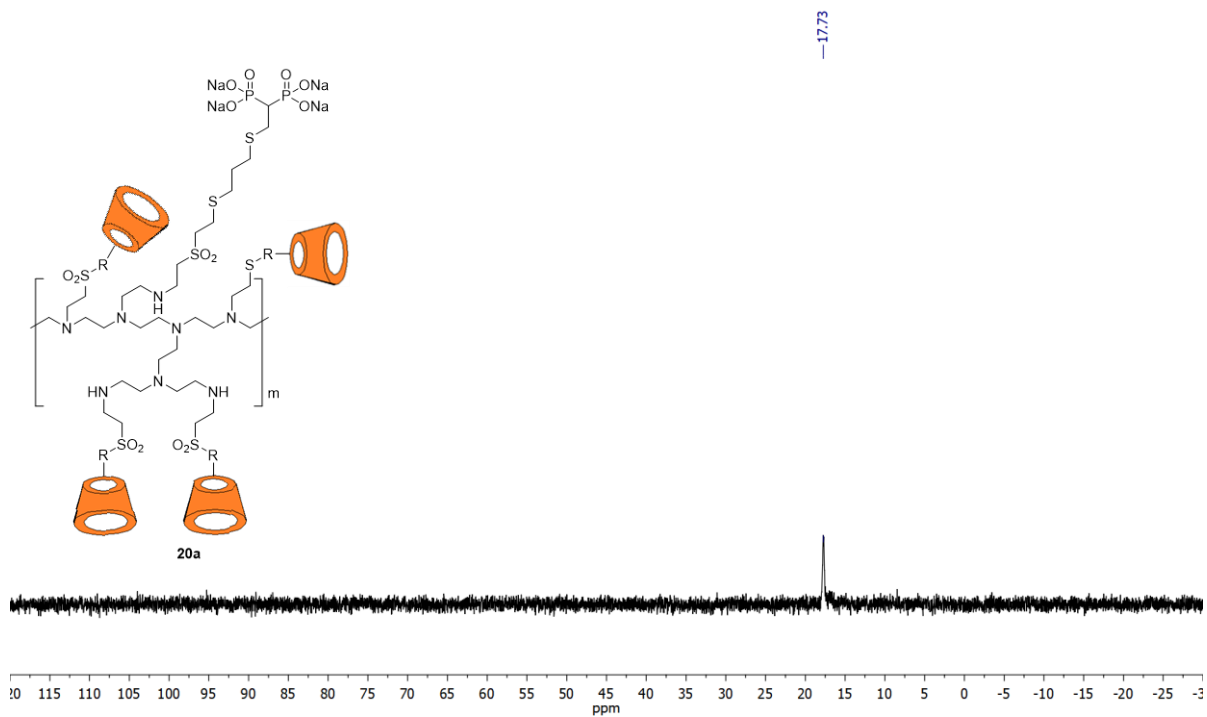

**Figure S39.**  $^{31}\text{P}$  NMR (202 MHz,  $\text{D}_2\text{O}/\text{DMSO-}d_6$ ) spectrum of 20a.

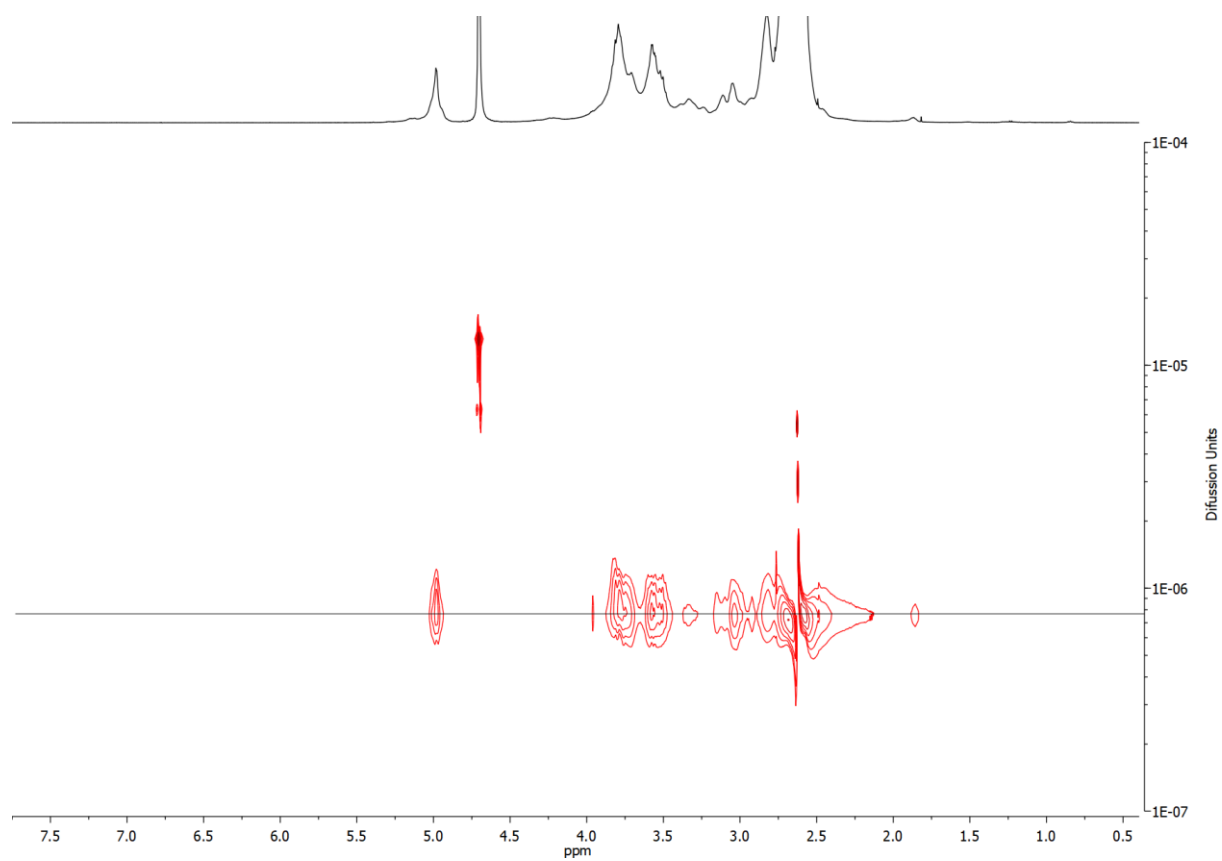

**Figure S40.** DOSY NMR (500 MHz, D<sub>2</sub>O/DMSO-*d*<sub>6</sub>) spectrum of **20a**.



## Compound 20b:

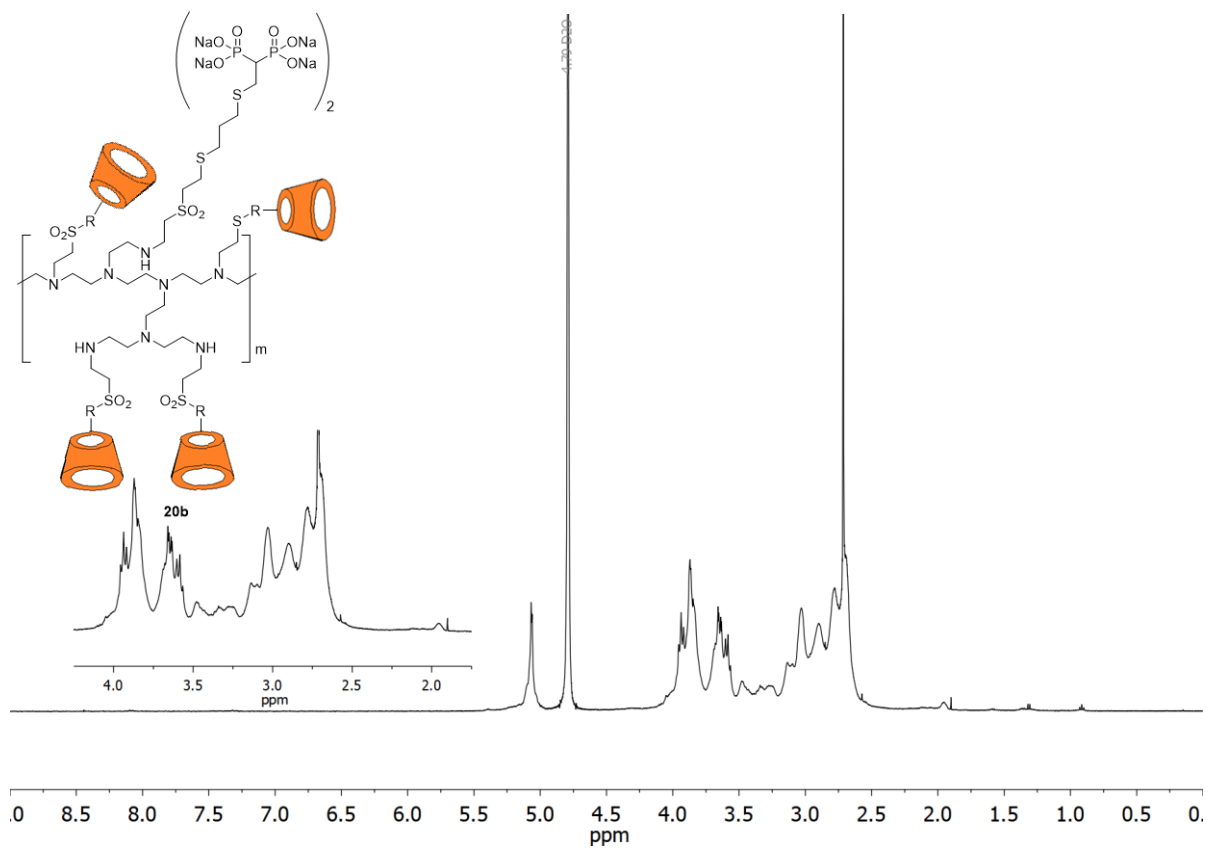

Figure S41. <sup>1</sup>H NMR (500 MHz, D<sub>2</sub>O/DMSO-*d*<sub>6</sub>) spectrum of 20b.

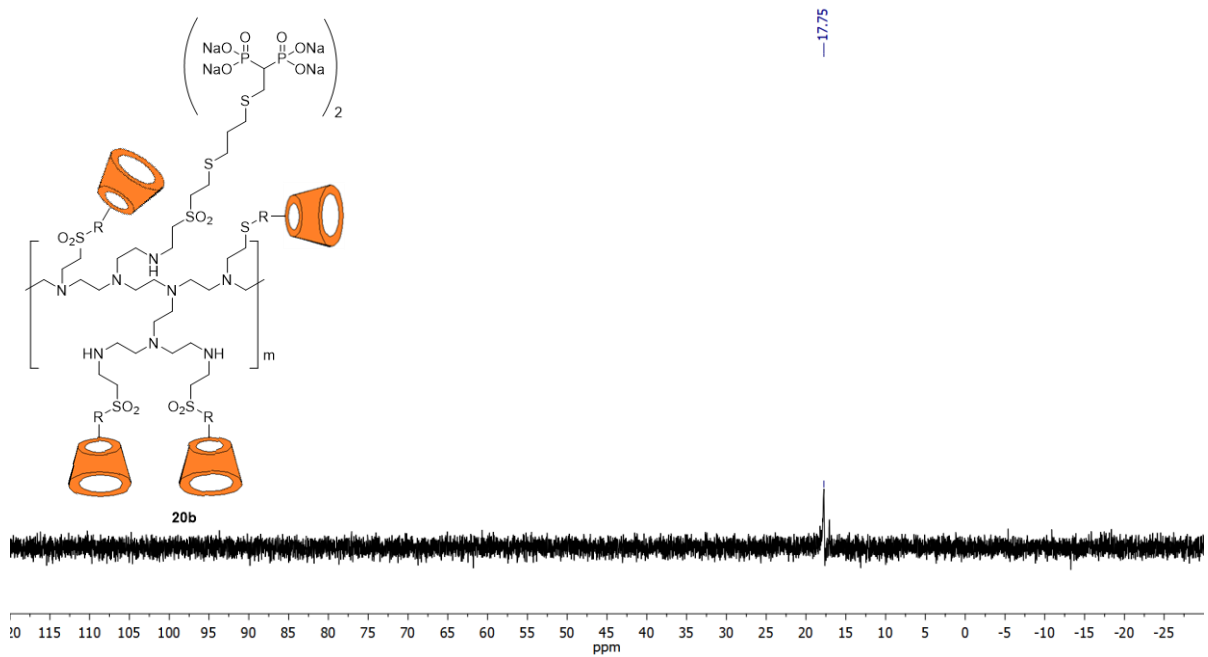

Figure S42. <sup>31</sup>P NMR (162 MHz, D<sub>2</sub>O/DMSO-*d*<sub>6</sub>) spectrum of 20b.

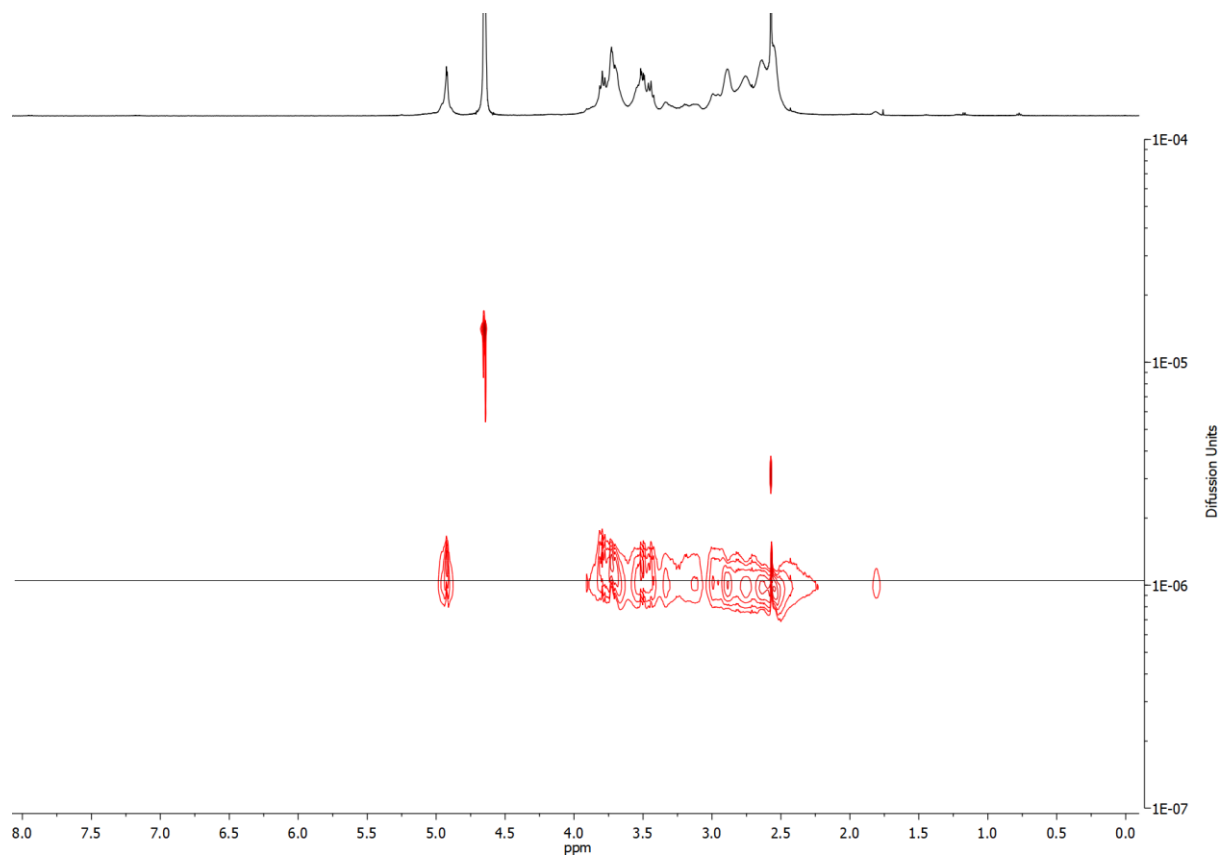

**Figure S43.** DOSY NMR (500 MHz, D<sub>2</sub>O/DMSO-*d*<sub>6</sub>) spectrum of **20b**.

### Compound 21a:

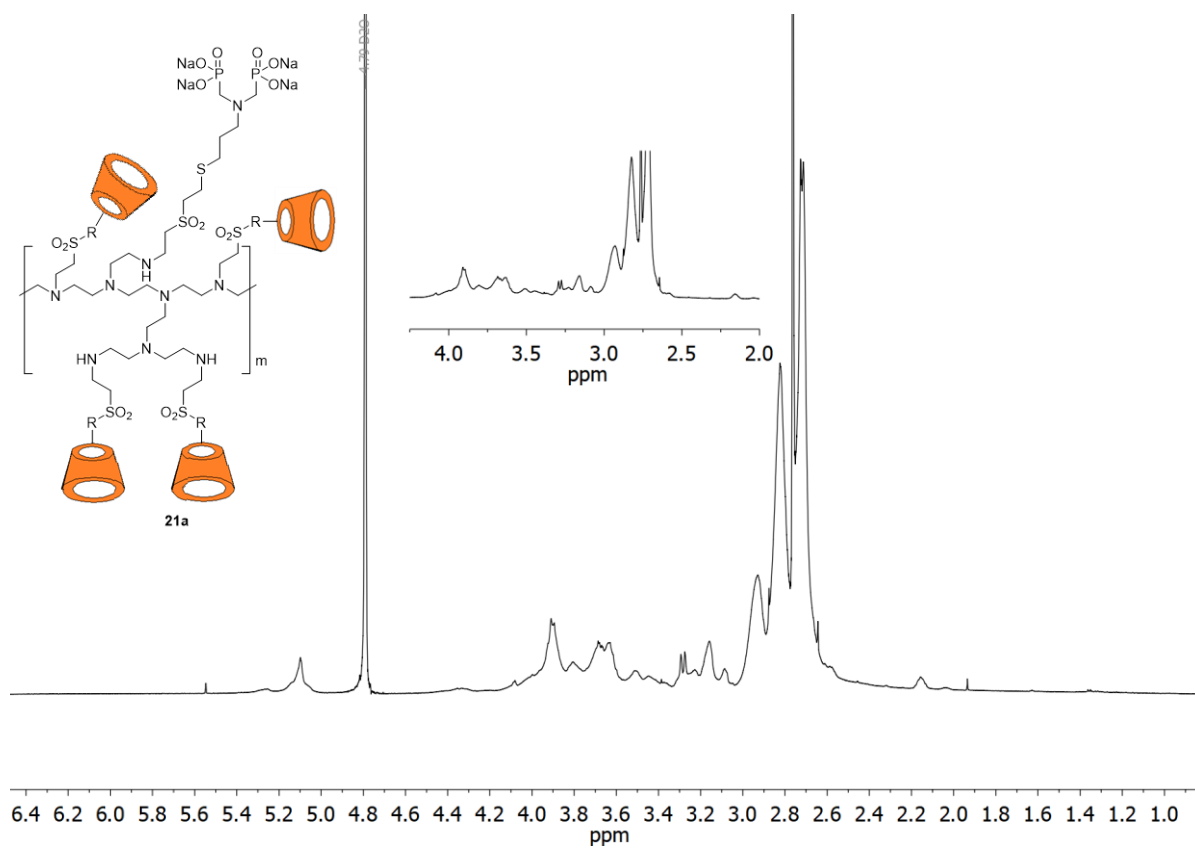

**Figure S44.** Partial  $^1\text{H}$  NMR (600 MHz,  $\text{D}_2\text{O}/\text{DMSO-}d_6$ ) spectrum of **21a**.

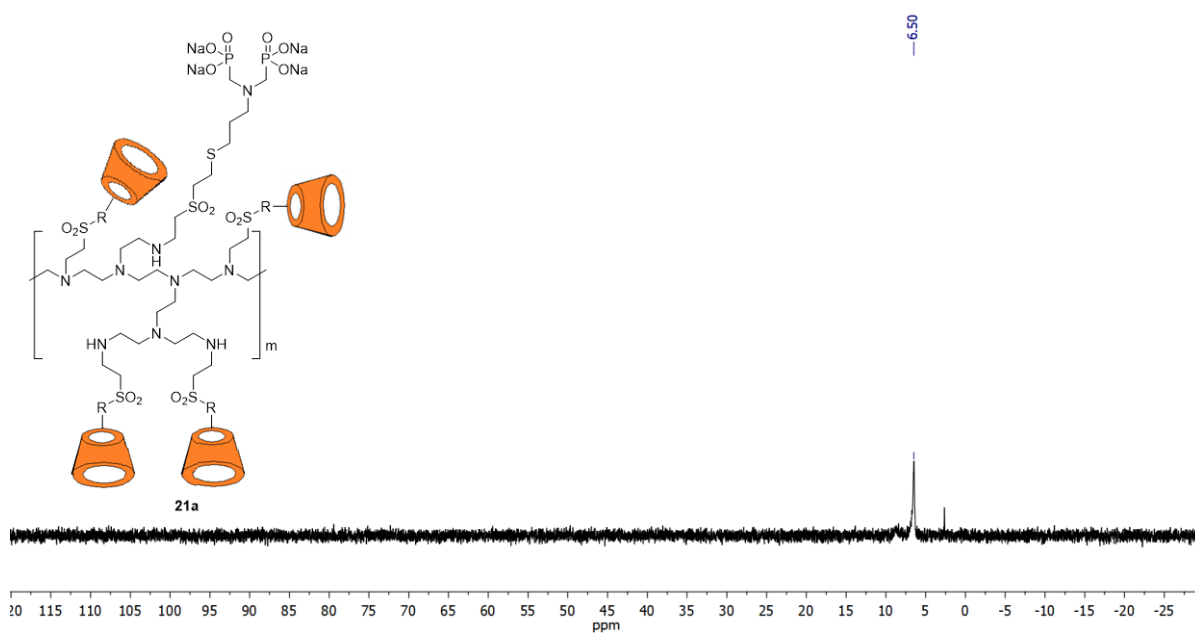

**Figure S45.**  $^{31}\text{P}$  NMR (202 MHz,  $\text{D}_2\text{O}/\text{DMSO-}d_6$ ) spectrum of **21a**.

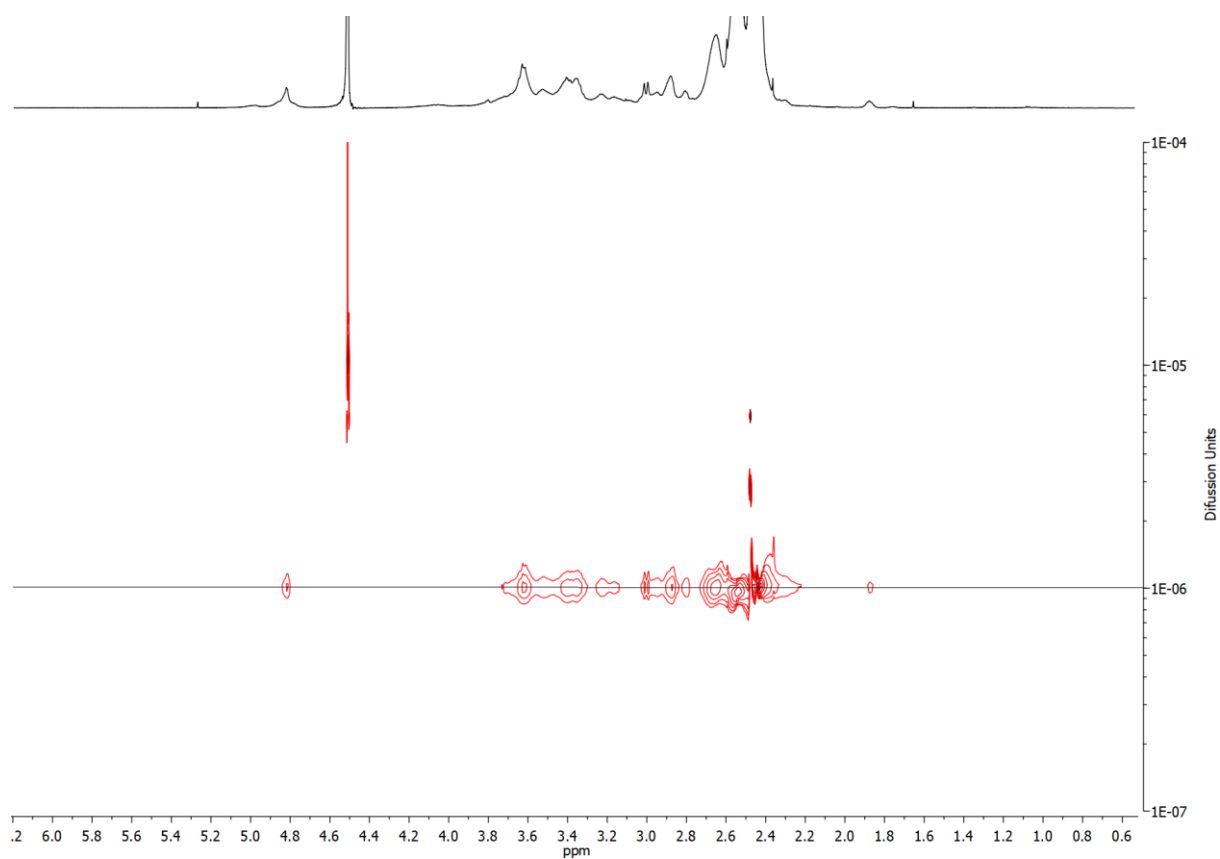

**Figure S45.** DOSY NMR (600 MHz, D<sub>2</sub>O/DMSO-*d*<sub>6</sub>) spectrum of **21a**.

## Compound 21b:

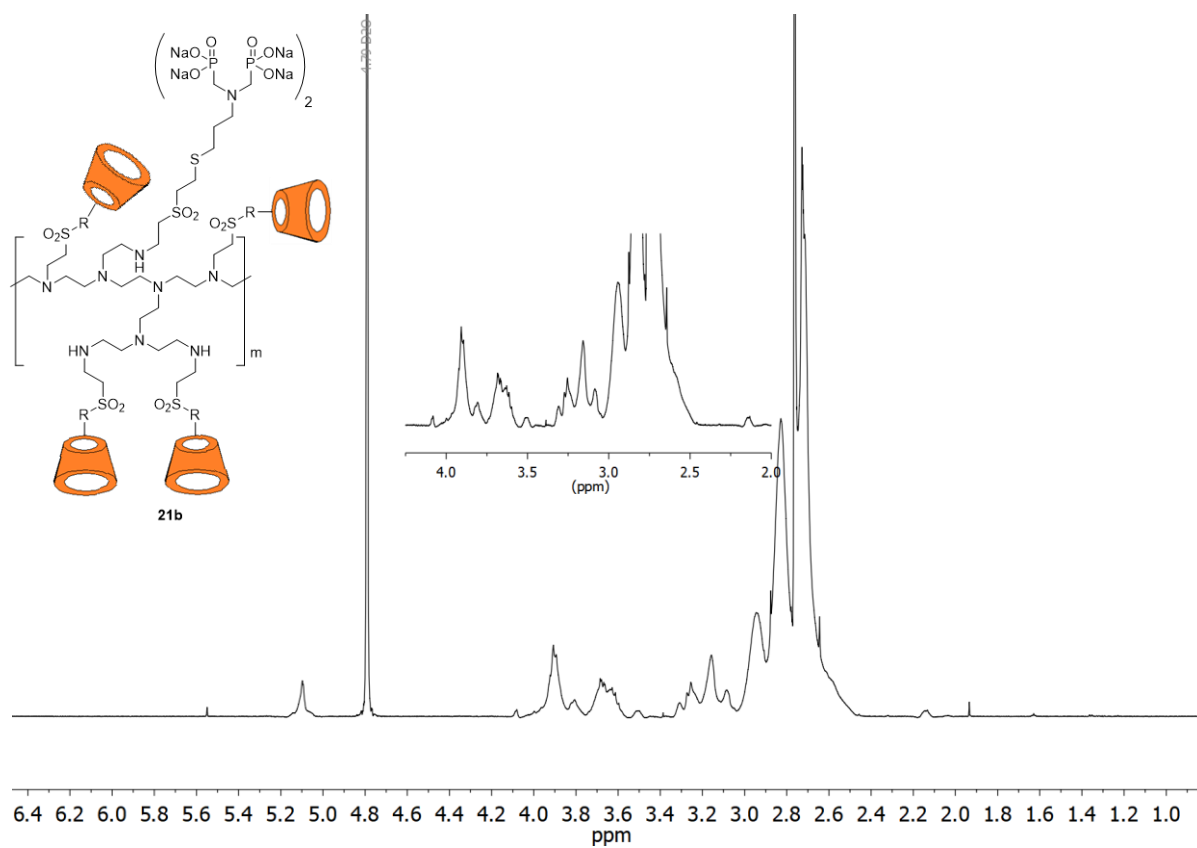

Figure S47. Partial  $^1\text{H}$  NMR (600 MHz,  $\text{D}_2\text{O}/\text{DMSO}-d_6$ ) spectrum of 21b.

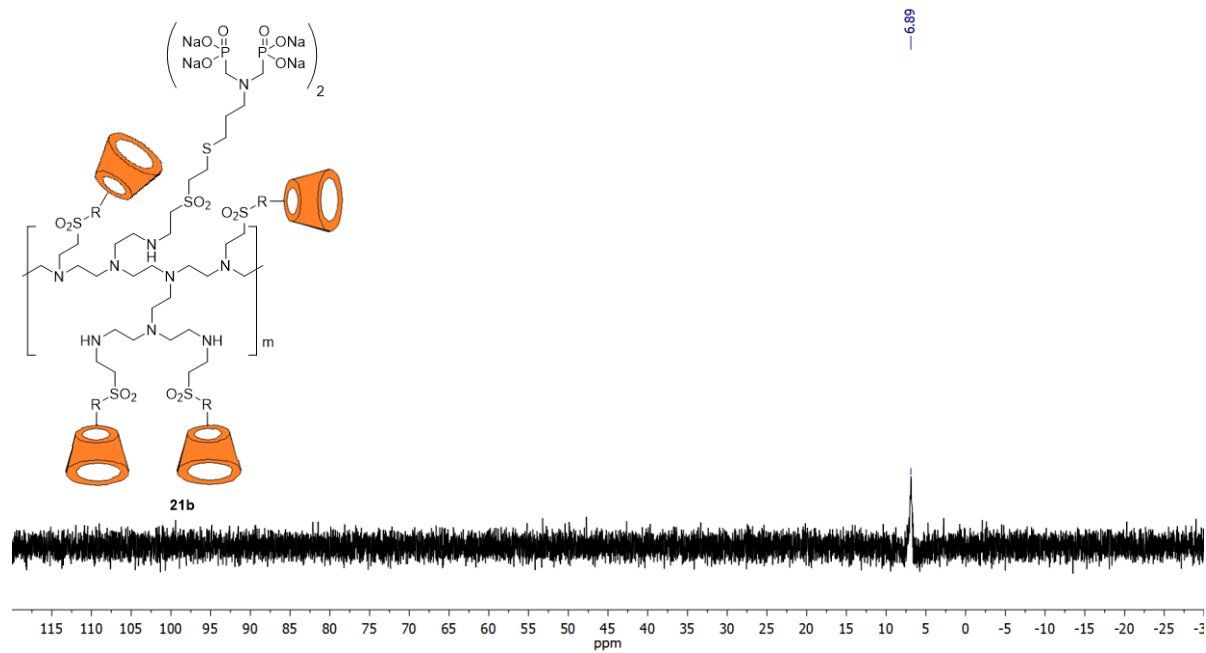

Figure S48.  $^{31}\text{P}$  NMR (202 MHz,  $\text{D}_2\text{O}/\text{DMSO}-d_6$ ) spectrum of 21b.

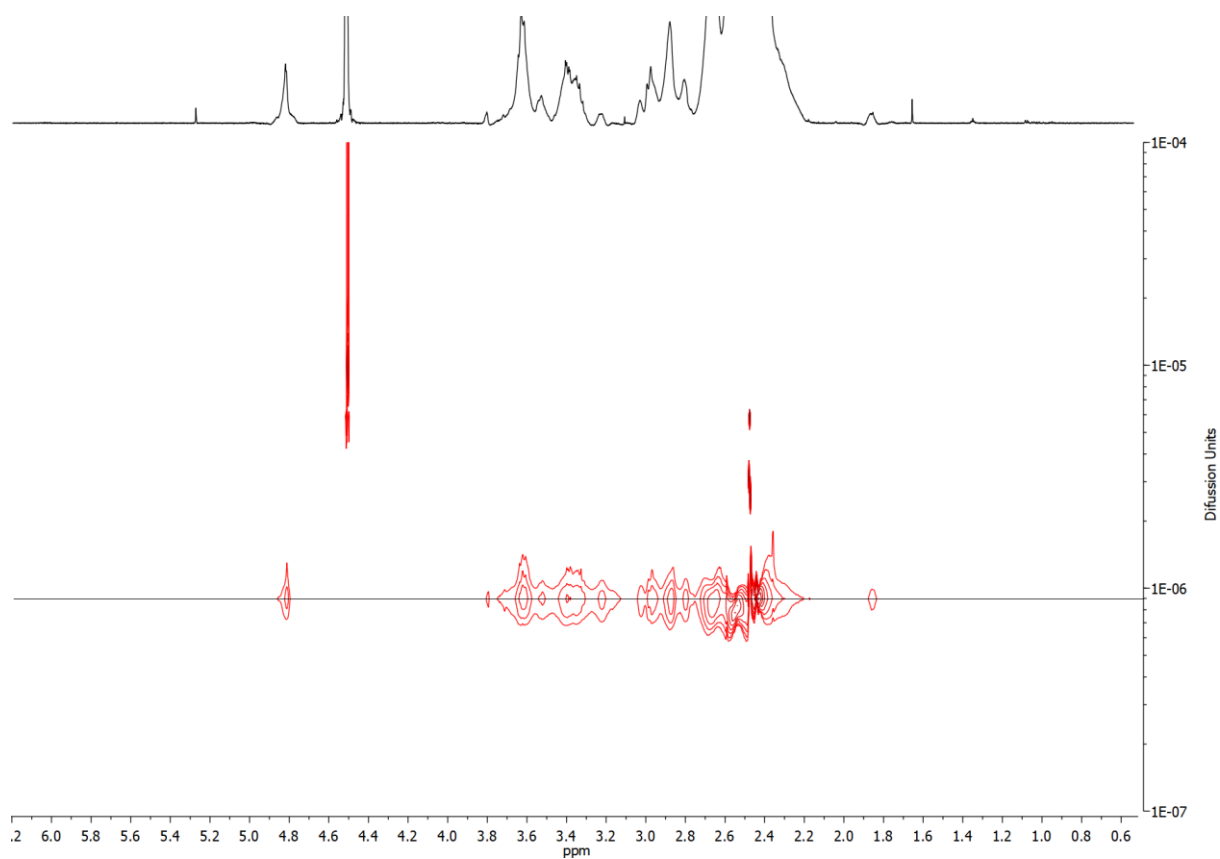

**Figure S49.** DOSY NMR (600 MHz, D<sub>2</sub>O/DMSO-*d*<sub>6</sub>) spectrum of **21b**.

**Compound 22a:**

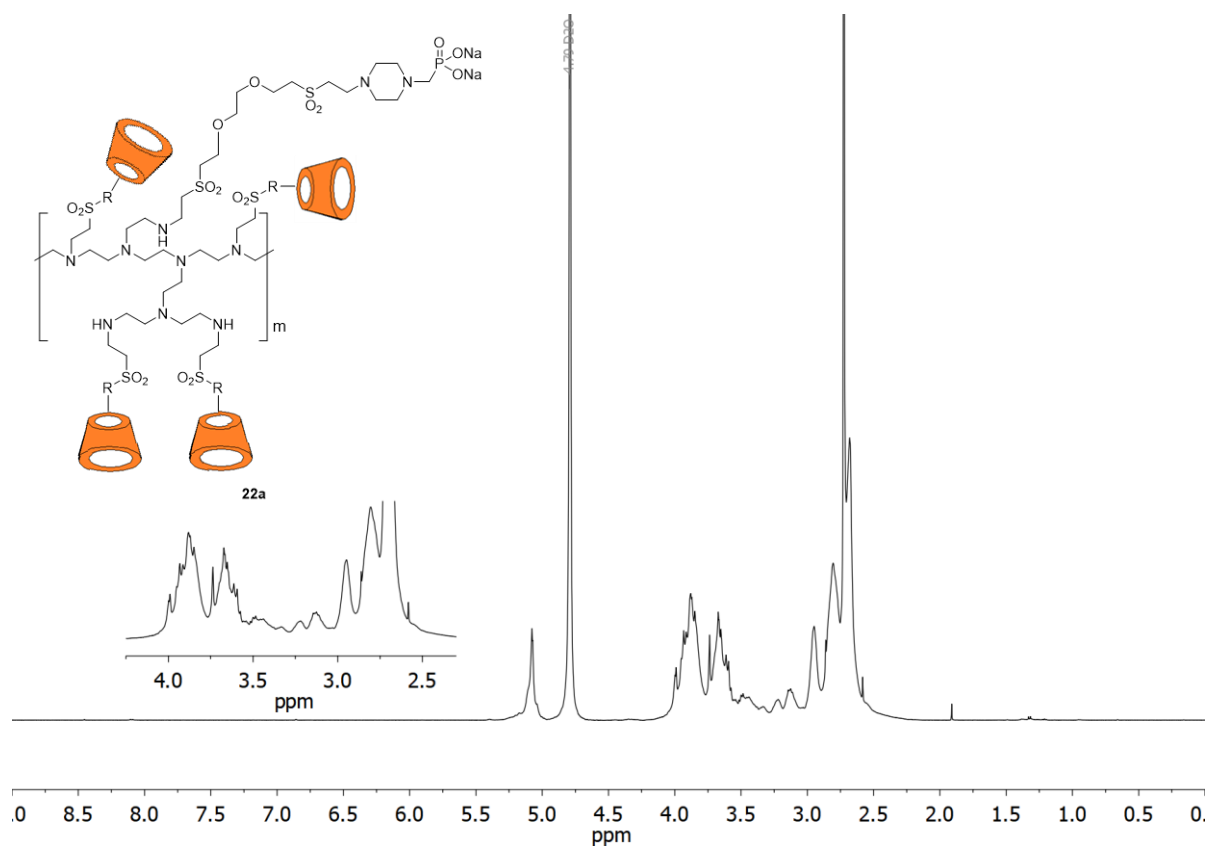

**Figure S50.**  $^1\text{H}$  NMR (500 MHz,  $\text{D}_2\text{O}/\text{DMSO-}d_6$ ) spectrum of 22a.

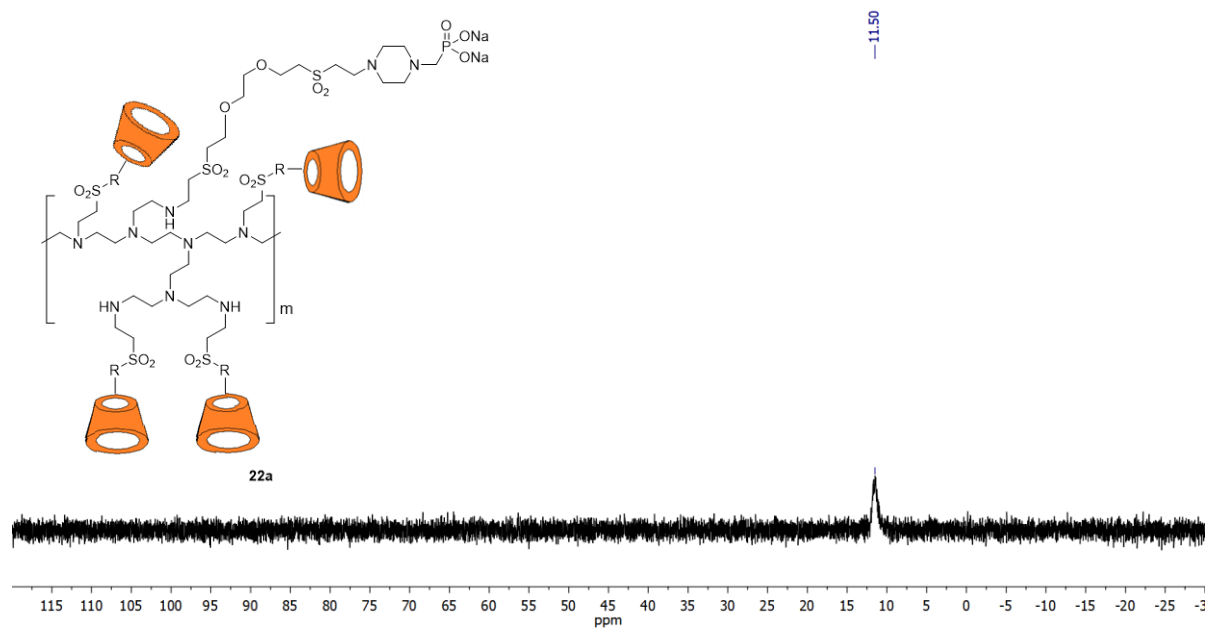

**Figure S51.**  $^{31}\text{P}$  NMR (202 MHz,  $\text{D}_2\text{O}/\text{DMSO-}d_6$ ) spectrum of 22a.

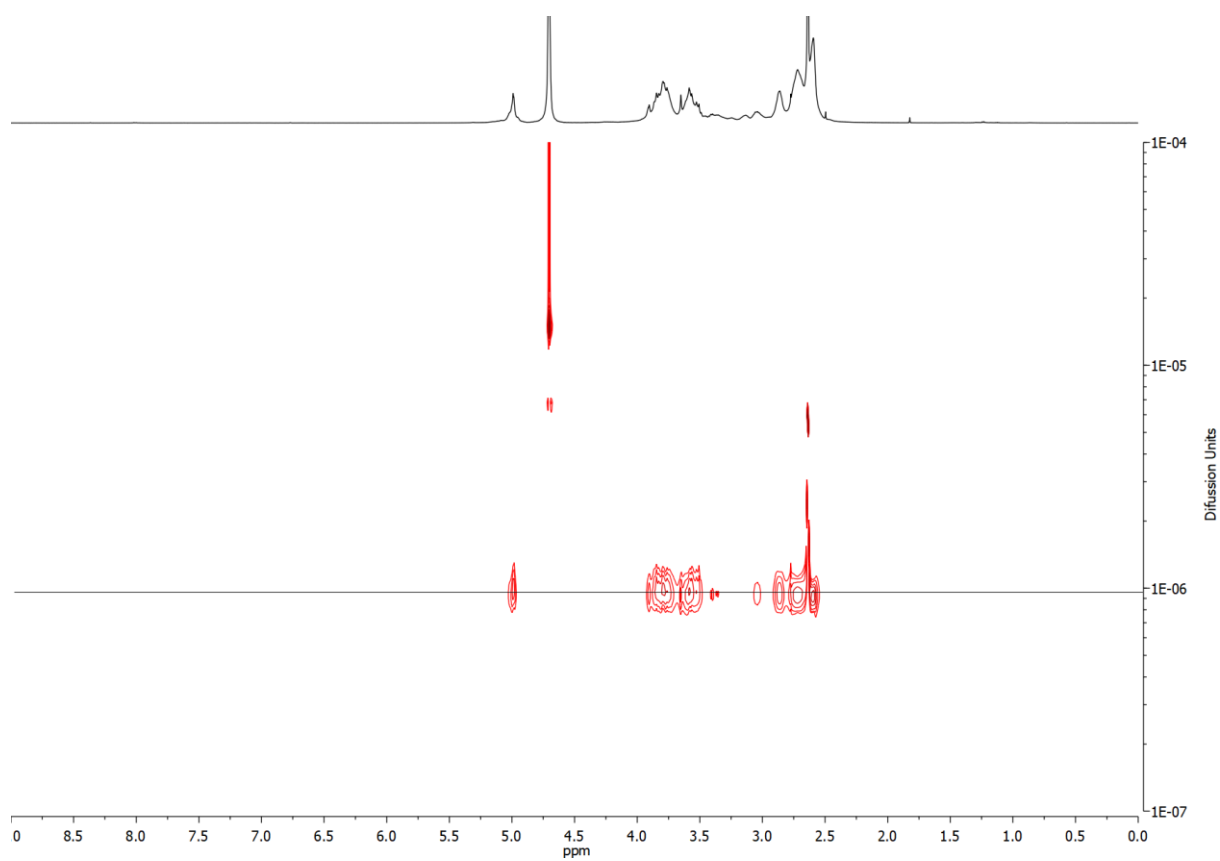

**Figure S52.** DOSY NMR (500 MHz, D<sub>2</sub>O/DMSO-*d*<sub>6</sub>) spectrum of **22a**.





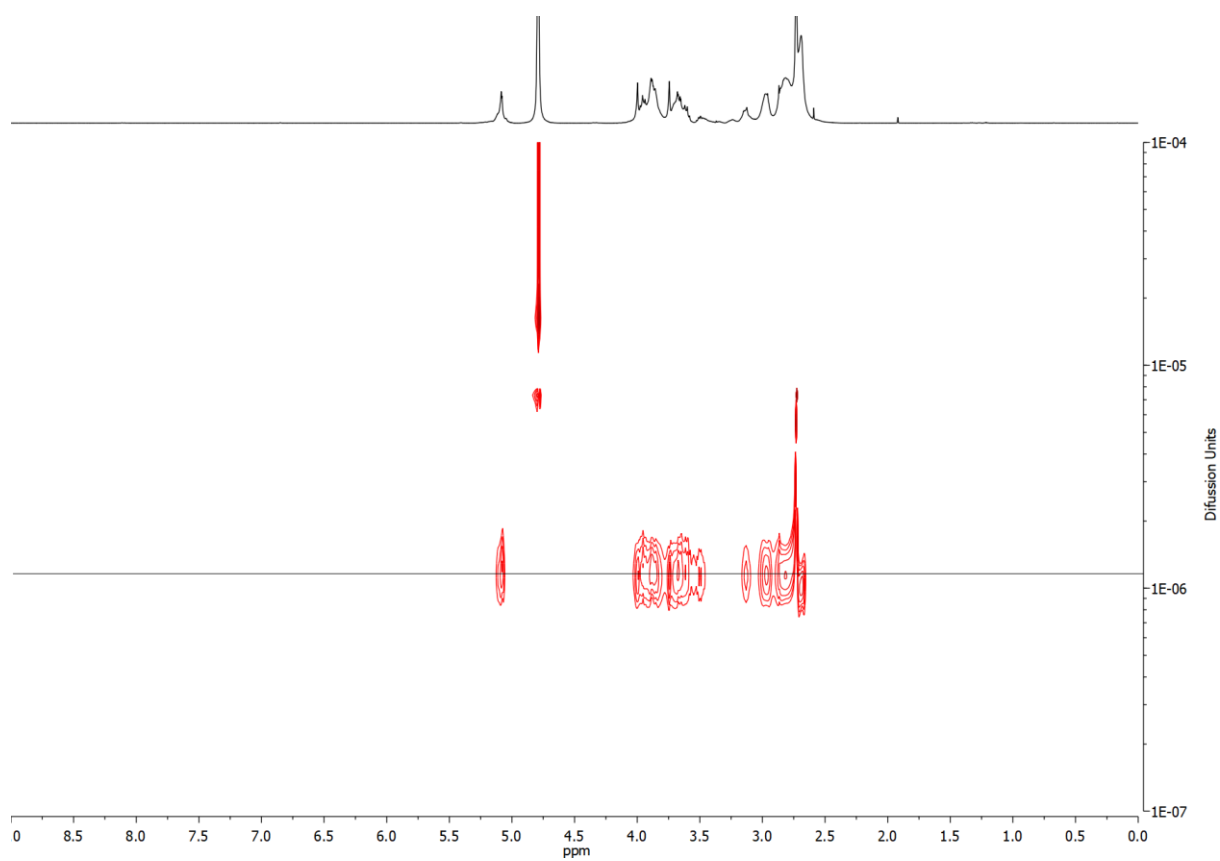

**Figure S55.** DOSY NMR (500 MHz, D<sub>2</sub>O/DMSO-*d*<sub>6</sub>) spectrum of **22b**.

### 3. HRMS spectra of key compounds

#### Compound 5

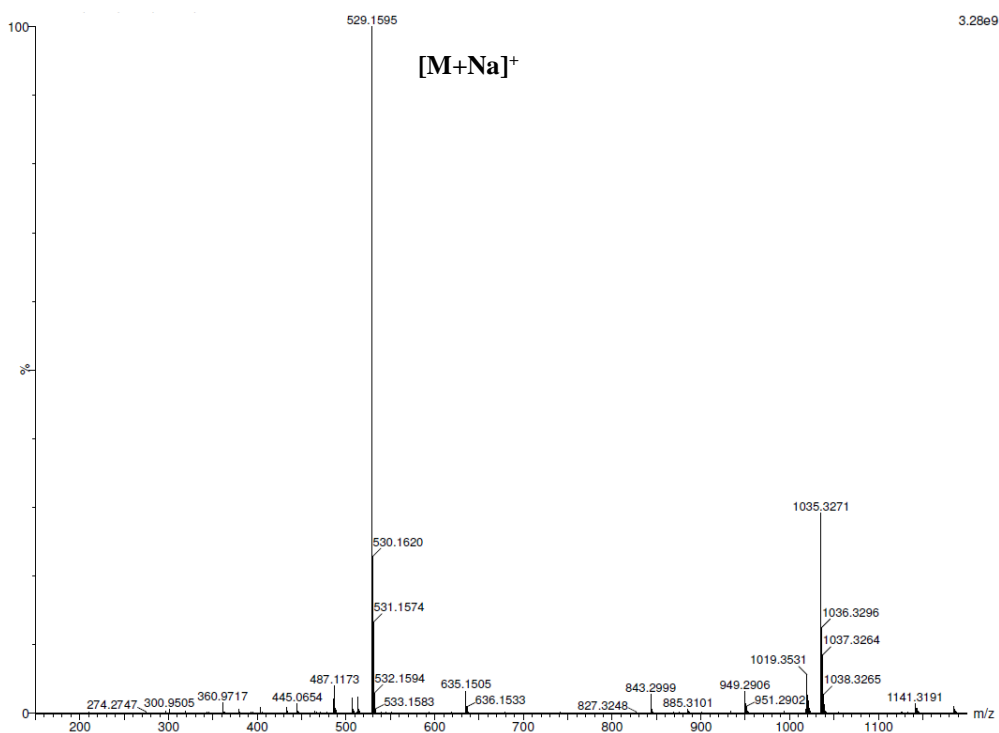

Figure S56. HRMS (ESI<sup>+</sup>) spectrum of 5.

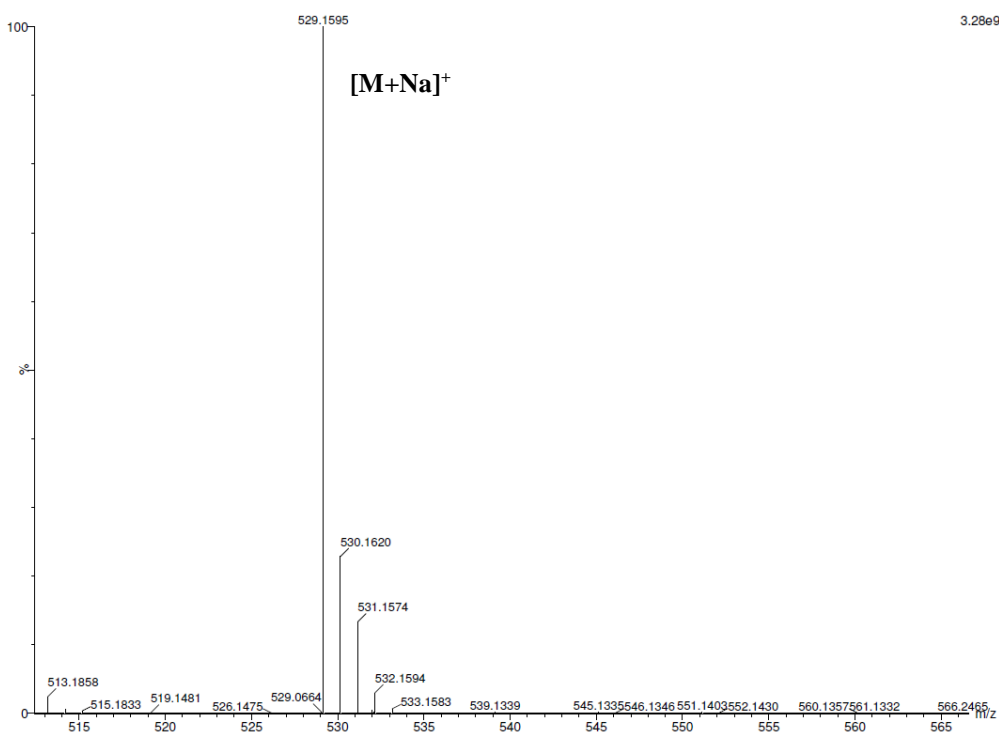

Figure S57. Partial HRMS (ESI<sup>+</sup>) spectrum of 5.

## Compound 7

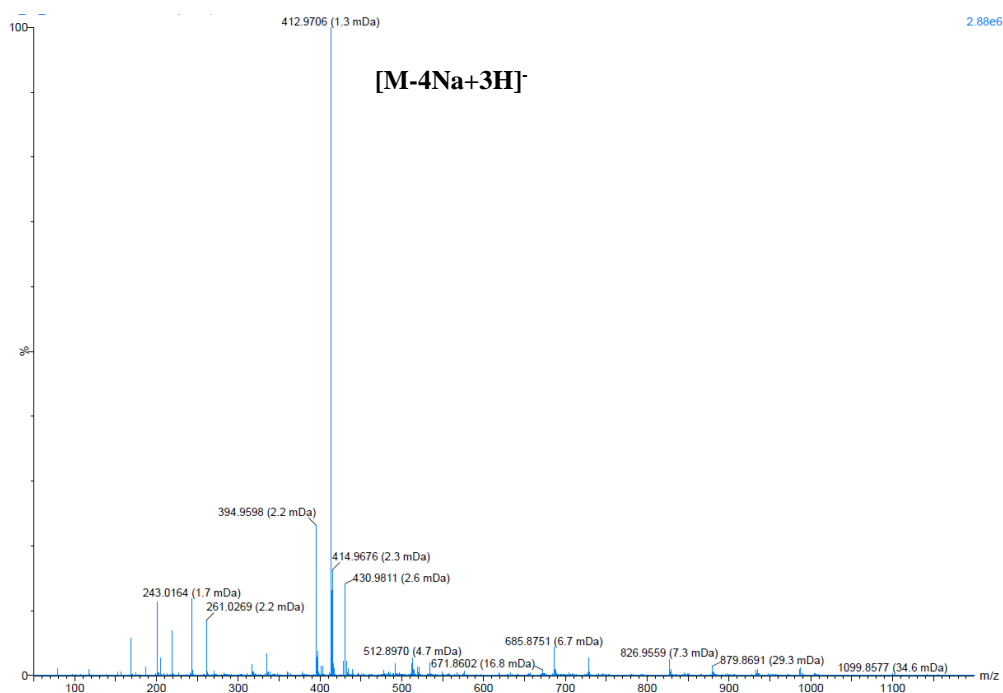

Figure S58. HRMS (ESI-) spectrum of **7** (performed using 0.1% of formic acid).

## Compound 9

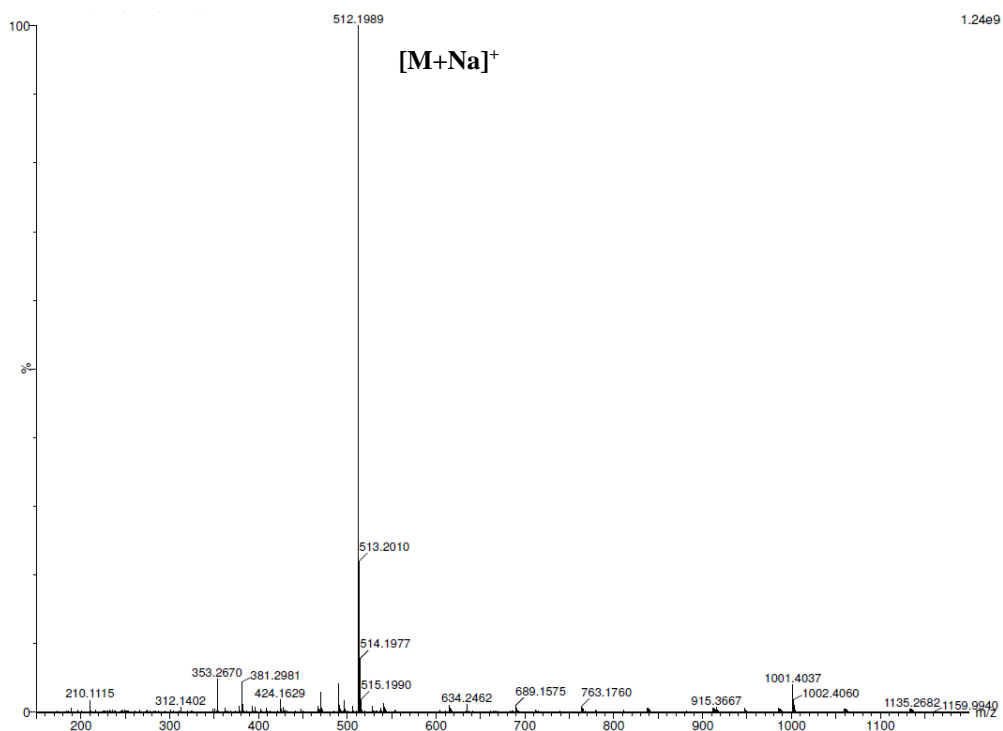

Figure S59. HRMS (ESI+) spectrum of **9**.

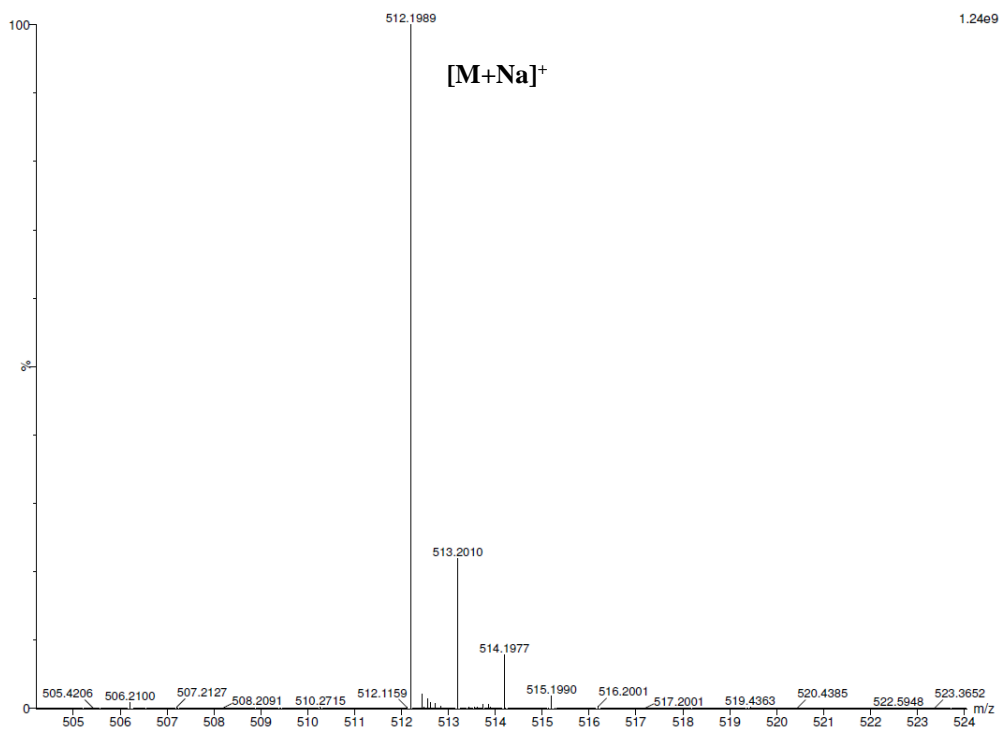

**Figure S60.** Partial HRMS (ESI<sup>+</sup>) spectrum of **9**.

## Compound 11

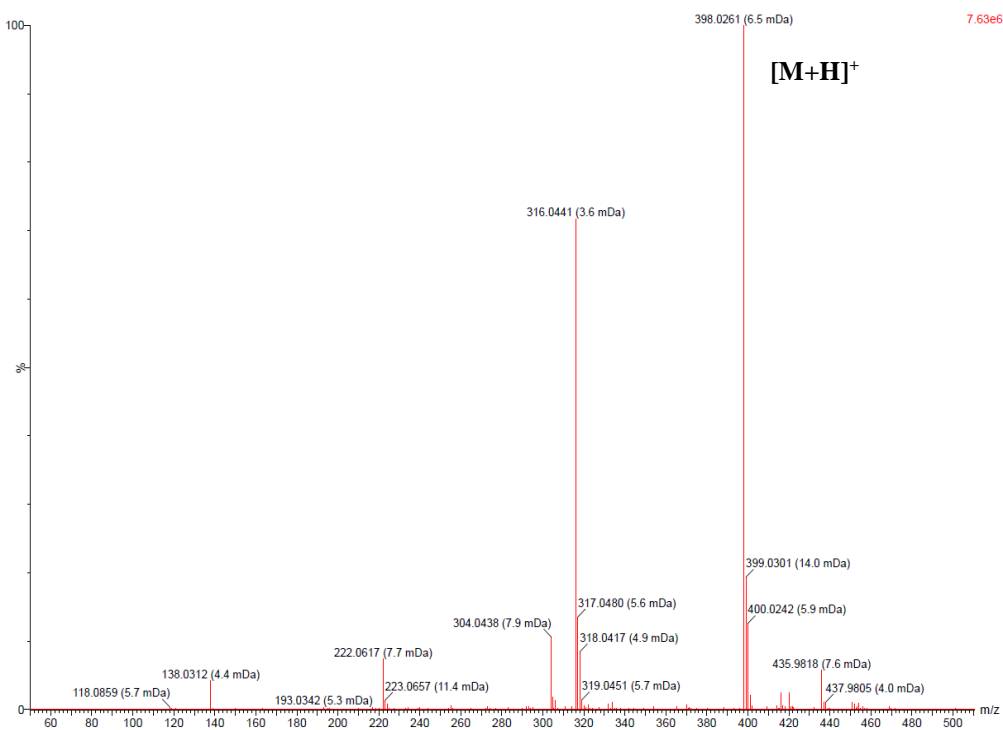

**Figure S61.** HRMS (ESI<sup>+</sup>) spectrum of **11** (performed using 0.1% of formic acid).

# Compound 13

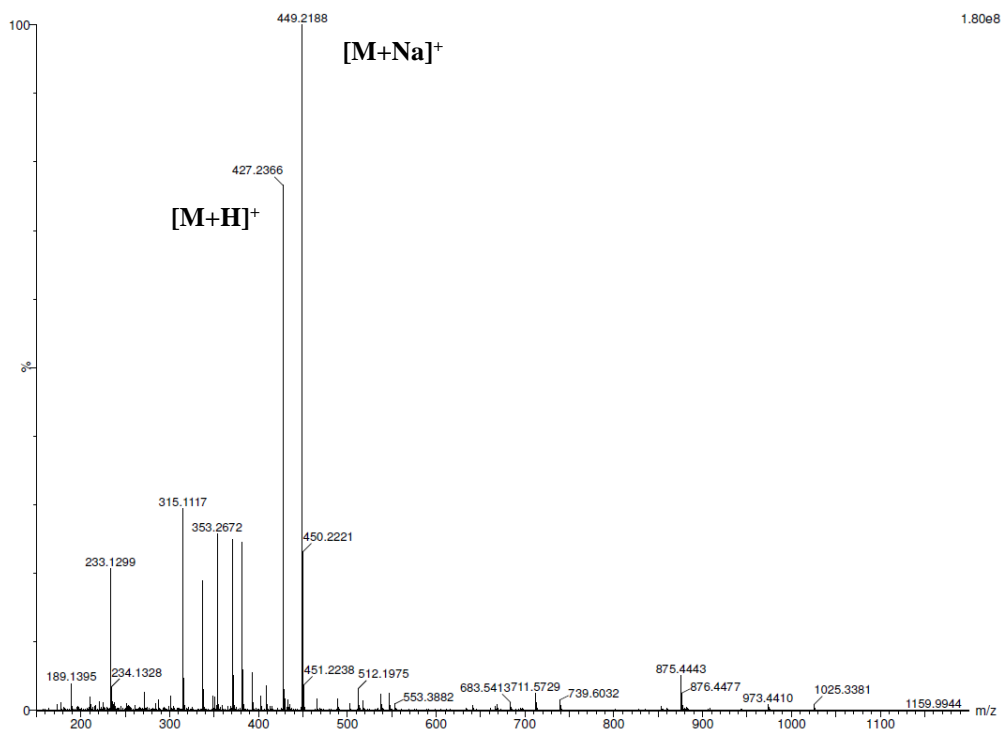

Figure S62. HRMS (ESI<sup>+</sup>) spectrum of 13.

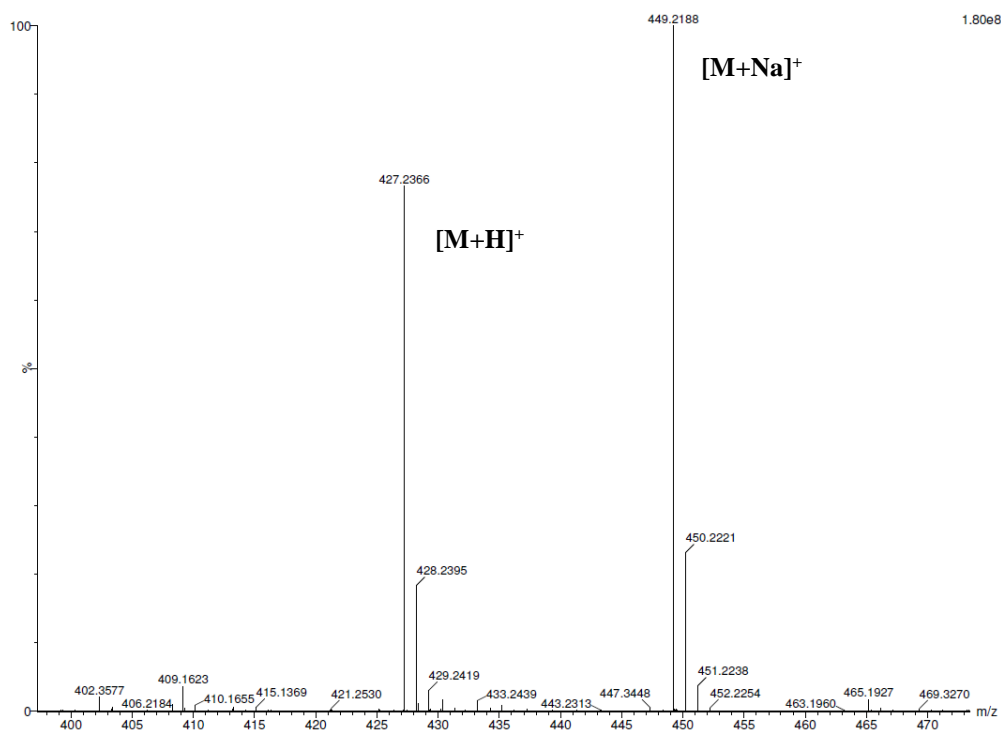

Figure S63. Partial HRMS (ESI<sup>+</sup>) spectrum of 13.

## Compound 14

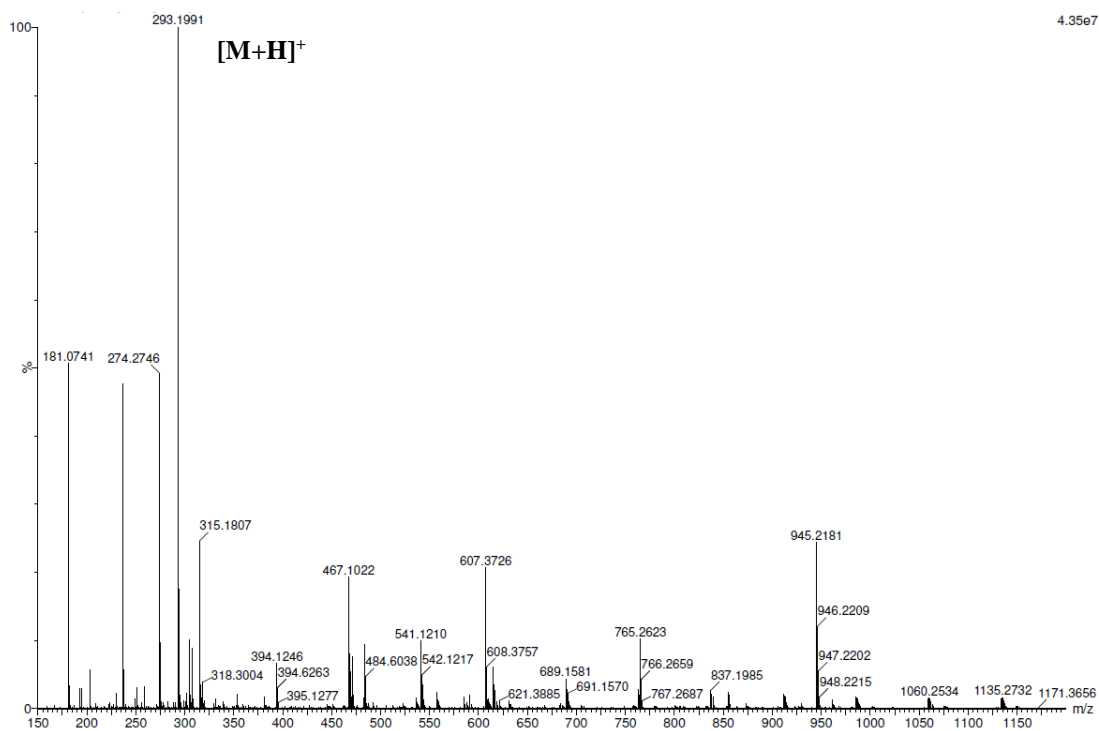

Figure S64. HRMS (ESI<sup>+</sup>) spectrum of 14.

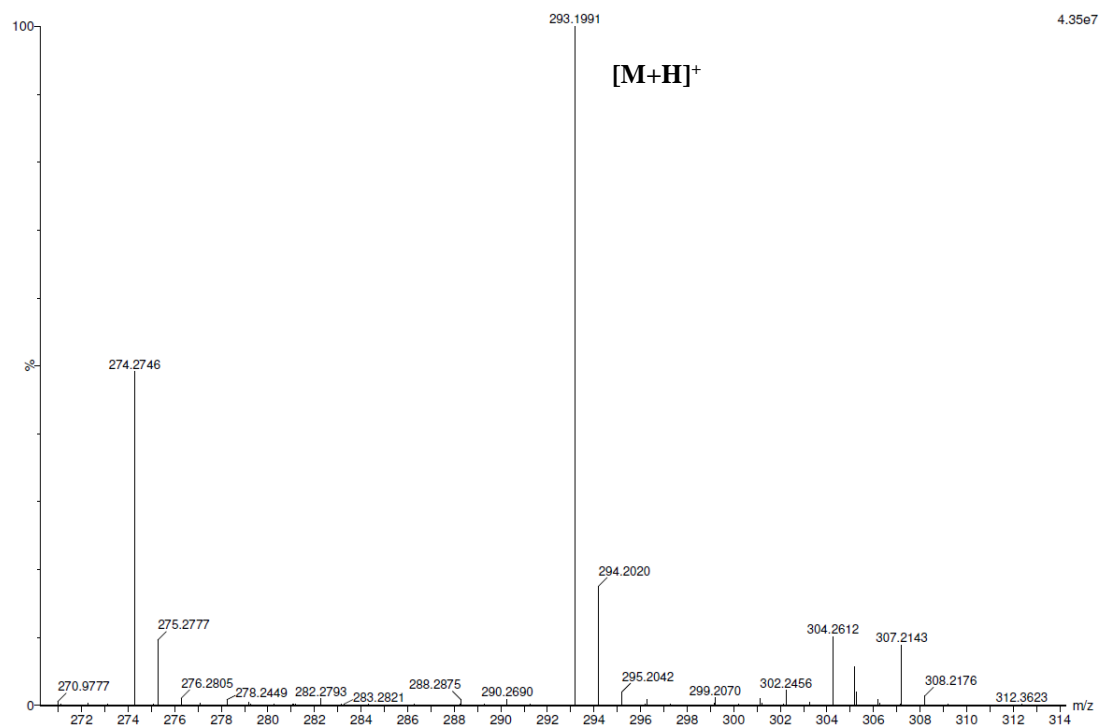

Figure S65. Partial HRMS (ESI<sup>+</sup>) spectrum of 14.

# Compound 16

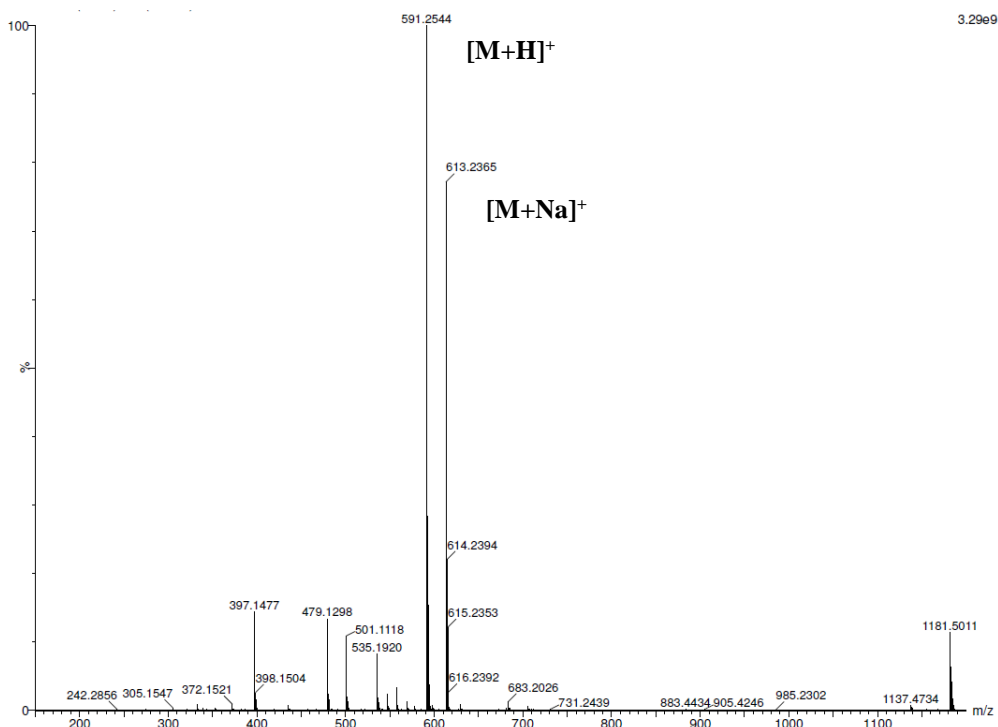

Figure S66. HRMS (ESI<sup>+</sup>) spectrum of 16.

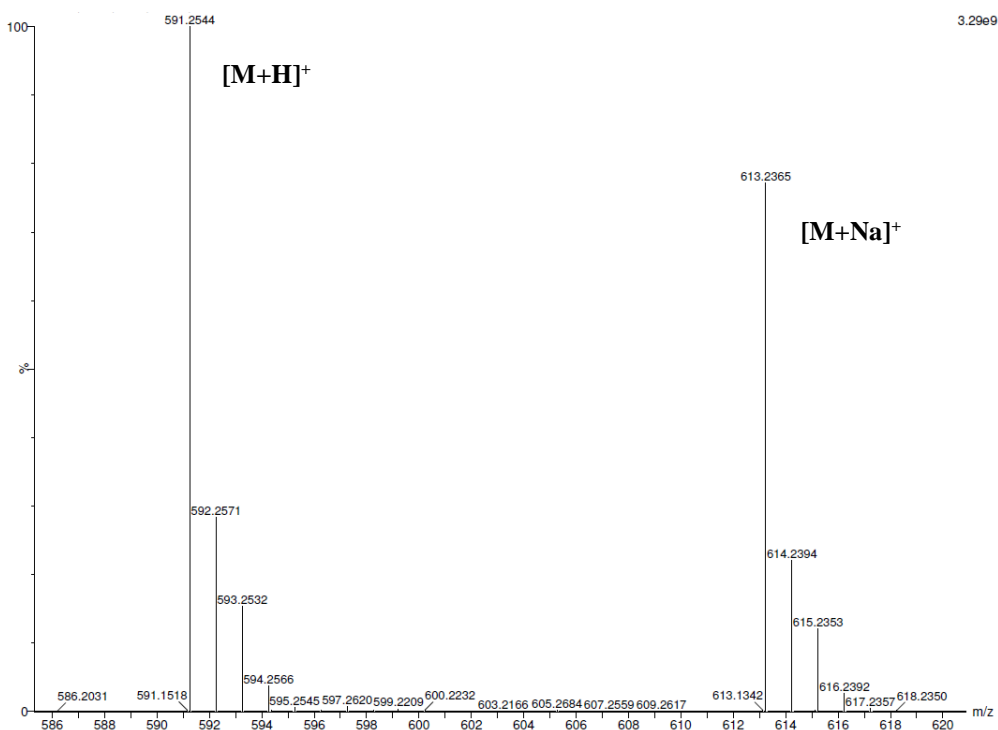

Figure S67. Partial HRMS (ESI<sup>+</sup>) spectrum of 16.



# Compound 17

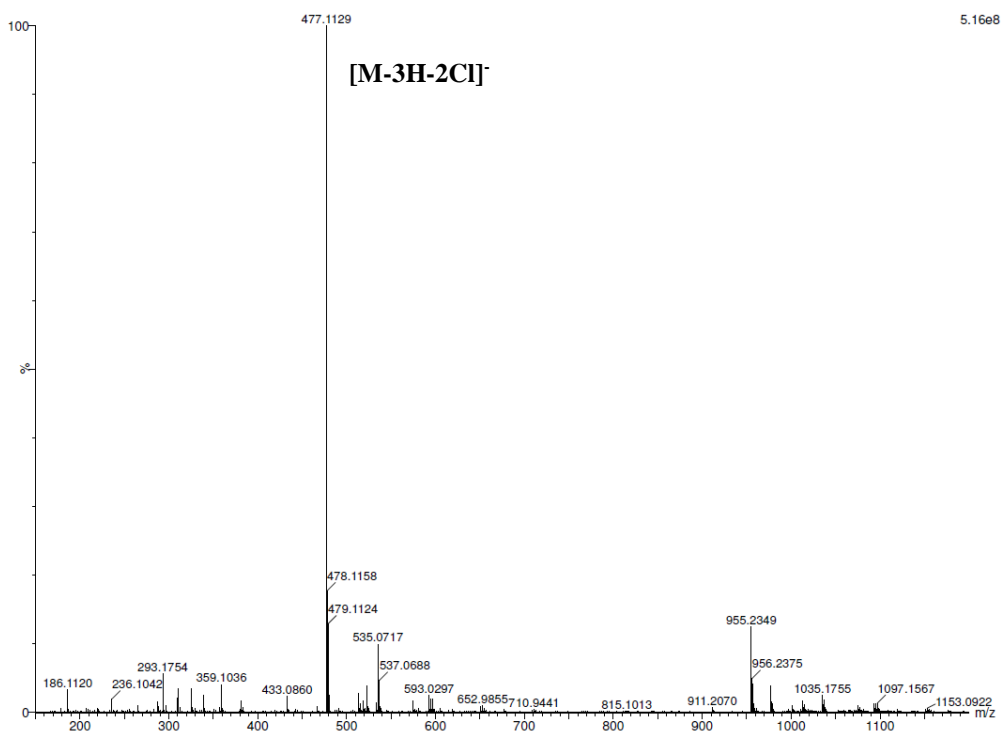

Figure S68. HRMS (ESI) spectrum of 17.

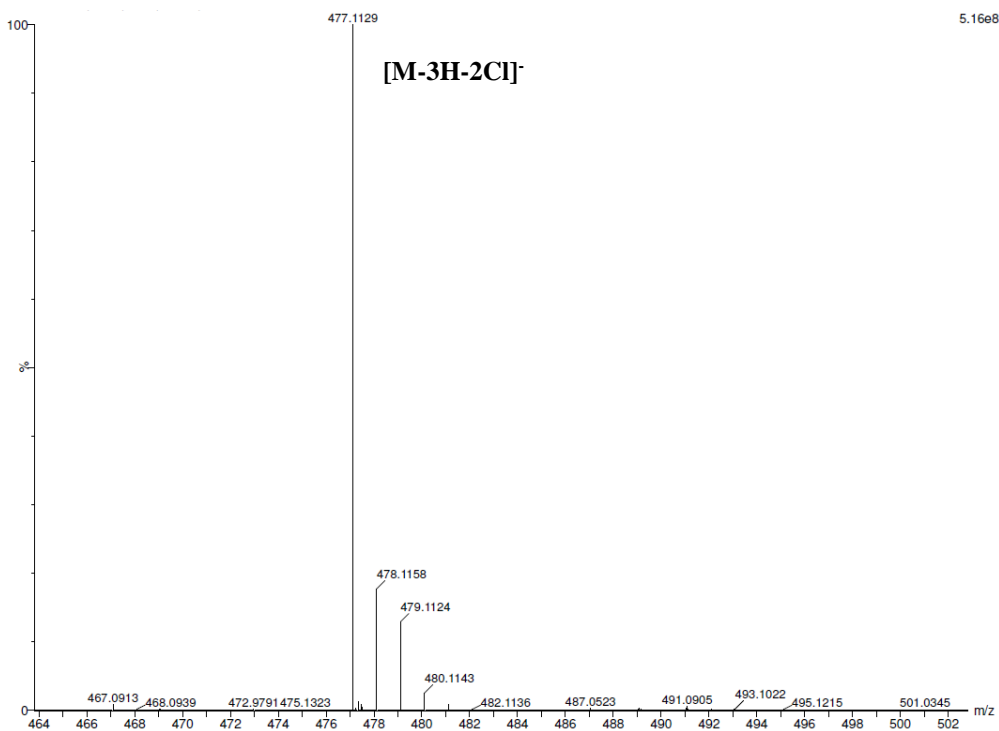

Figure S69. Partial HRMS (ESI) spectrum of 17.

## 5. Particle size of the PEI-BP-CD ternary conjugates

Table S2. Particle size of the PEI-BP-CD ternary conjugates

| Nanoparticle | Size (nm) | SEM  |
|--------------|-----------|------|
| <b>20a</b>   | 445.9     | 55.6 |
| <b>20b</b>   | 450.9     | 15.8 |
| <b>21a</b>   | 533.0     | 45.6 |
| <b>21b</b>   | 402.8     | 29.4 |
| <b>22a</b>   | 529.8     | 22.1 |
| <b>22b</b>   | 560.3     | 27.5 |

The nanoparticle size was determined using the Zetasizer  $\mu$ V instrument (Malvern) and 50  $\mu$ l UV-transparent Disposable cuvettes (Sarsted). A 0.1 mg/ml suspension of nanoparticles (PEI- $\beta$ CD or PEI-BP derivatives) was prepared in PBS and the measurement was carried out at 25°C with a refractive index of the sample of 1.53 and A=0, with 3 cycles of 15 measurements of 10 s.

## 6. Subcellular fractionation of MG-63 cells

**Table S3.** Subcellular fractionation of MG-63 cells

| Fraction     | Pyruvate Carboxylase |                | Histone H3     |                |
|--------------|----------------------|----------------|----------------|----------------|
|              | DOX                  | DOXc21a        | DOX            | DOXc21a        |
| Lysate       | 100.00 ± 6.68        | 100.00 ± 10.31 | 100.00 ± 16.10 | 100.80 ± 12.80 |
| Cytosol      | 31.43 ± 9.54         | 42.73 ± 1.43   | 16.04 ± 4.54   | 11.49 ± 0.28   |
| Nuclei       | 123.40 ± 6.00        | 84.81 ± 33.64  | 109.13 ± 15.51 | 95.67 ± 5.18   |
| Mitochondria | 210.73 ± 21.46       | 210.94 ± 8.38  | 9.72 ± 2.90    | 7.61 ± 3.83    |

Mitochondria from MG-63 cells treated with DOX or **DOXc21a** for two hours were isolated by a differential centrifugation method. Briefly, cells were washed and scraped with 1.5 ml of sterile ice-cold phosphate-buffered saline (PBS, Sigma-Aldrich, Missouri, USA) and centrifuged 10 min at 800 x g. The pellet was homogenized with a mitochondrial isolation buffer (Tris HCl 50 mM pH 7.5; sucrose 250mM, EDTA 1mM) in a Teflon-glass homogenizer at maximum speed for 10 passes. The cell lysate was centrifuged 10 min at 800 x g to remove cell debris and nuclei and then the supernatant was spun 10 min at 10 000 x g to obtain mitochondria enriched pellet and a cytosolic fraction as supernatant. All procedure was carried out in cold conditions (at 4 °C). Markers for each subcellular fraction were measured by Western-blot using an antibody against Pyruvate Carboxylase as mitochondrial marker and against Histone H3 as nuclear marker. Results are means ± S.E.M. (n=4).

## 7. Effects of inhibitors of internalization routes on DOX<sub>21b</sub> uptake

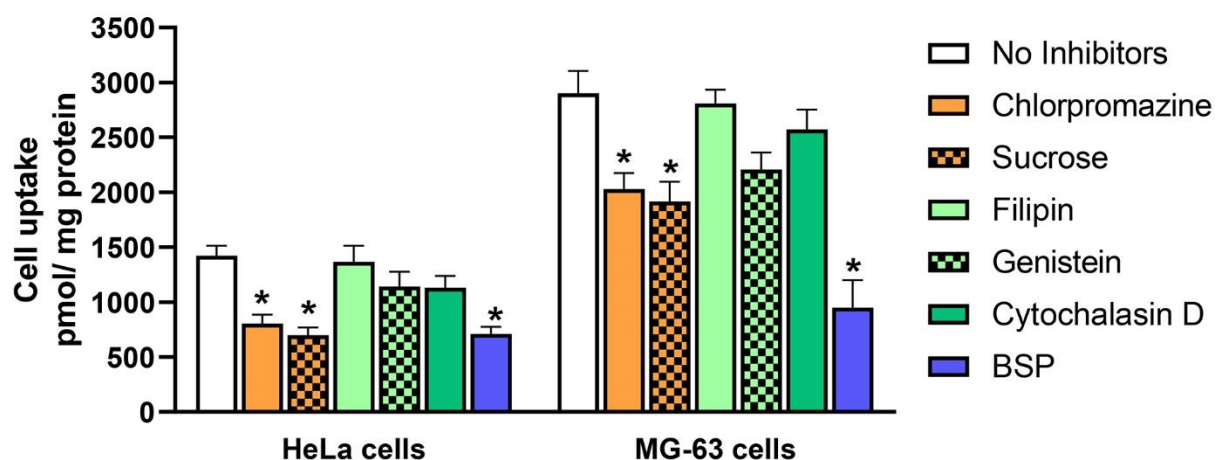

**Figure S70.** Effects of inhibitors of internalization routes on **DOX<sub>21b</sub>** uptake. HeLa and MG-63 sarcoma cells were pretreated with chlorpromazine (50  $\mu$ M), sucrose (0.45 M), filipin (5  $\mu$ g/mL), genistein (400  $\mu$ M), cytochalasin D (2  $\mu$ M) or bromosulfophthalein (BSP) (0.25 mM) for 30 min before incubation with **DOX<sub>21b</sub>** (1 $\mu$ M). DOX uptake was determined 2 h later. Results are expressed as pmol of DOX/mg protein as means  $\pm$  SEM (n = 6). \*p < 0.05 vs **DOX<sub>21b</sub>** treated cells.

## 8. Specific PEI-BP-CD (20-21b) and PEI-MP-CD (22b) conjugates uptake in bone cells

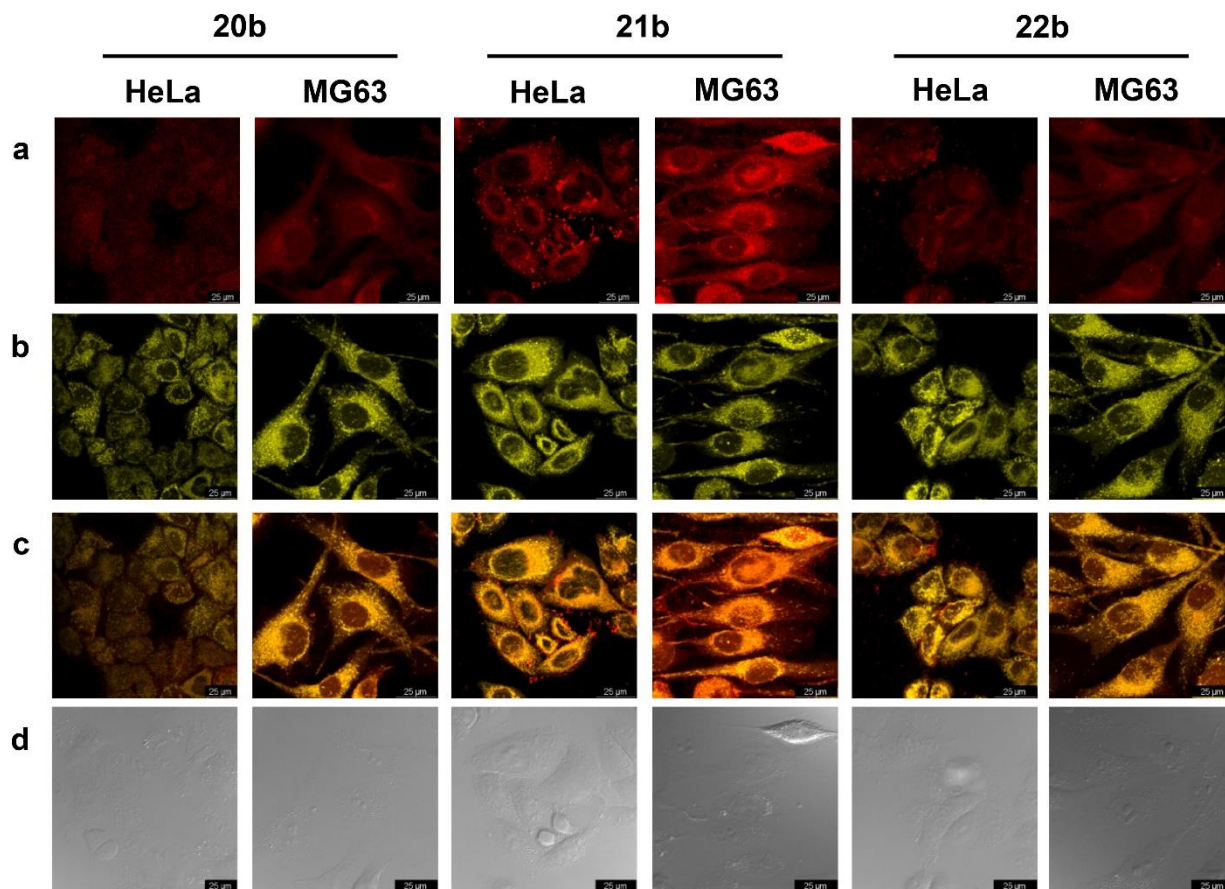

**Figure S71.** Specific PEI-BP-CD (20-21b) and PEI-MP-CD (22b) conjugates. HeLa and MG-63 sarcoma cells were incubated with mitotracker Deep Red (a) for 30 min, and then with different PEI-BP derivatives containing DOX (b) for 2 hours. Merge (c) and Nomarsky (d) photos are also depicted.

## 9. *In vivo* imaging of tumor MDA-MB-231 xenografts in mice

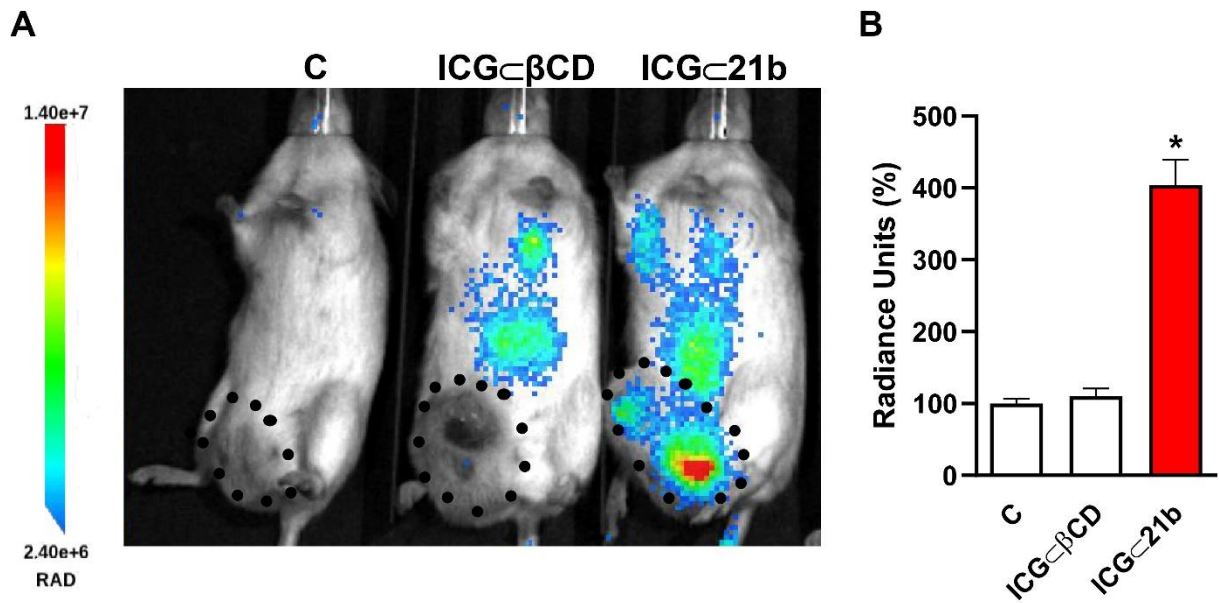

**Figure S72.** *In vivo* imaging of tumor MDA-MB-231 xenografts in mice. NSG mice bearing breast cancer (MDA-MB-231 cells) tumors were injected intravenously in the tail vein with ICG-βCD or ICG-21b and fluorescence was measured 30 min later. (A) ICG fluorescence images. The size of the xenografts is indicated by a dotted line. (B) Average radiance of the xenografts in vivo. Data are shown as means ± SEM (n = 4). \*p < 0.05 vs C animals.
